# Supplementary material for: Trans-vaccenic acid reprograms CD8+ T cells and anti-tumour immunity
Source: PubMed Central journal article supplement (PMC10686835; doi:10.1038/s41586-023-06749-3), 2023-11-22
Supplement: 41586_2023_6749_MOESM1_ESM.pdf [file 41586_2023_6749_MOESM1_ESM.pdf]

---

**Supplementary information**

---

***Trans*-vaccenic acid reprograms CD8<sup>+</sup> T cells  
and anti-tumour immunity**

---

In the format provided by the  
authors and unedited

Supplementary Figure 1. Gating strategies for flow cytometry analysis

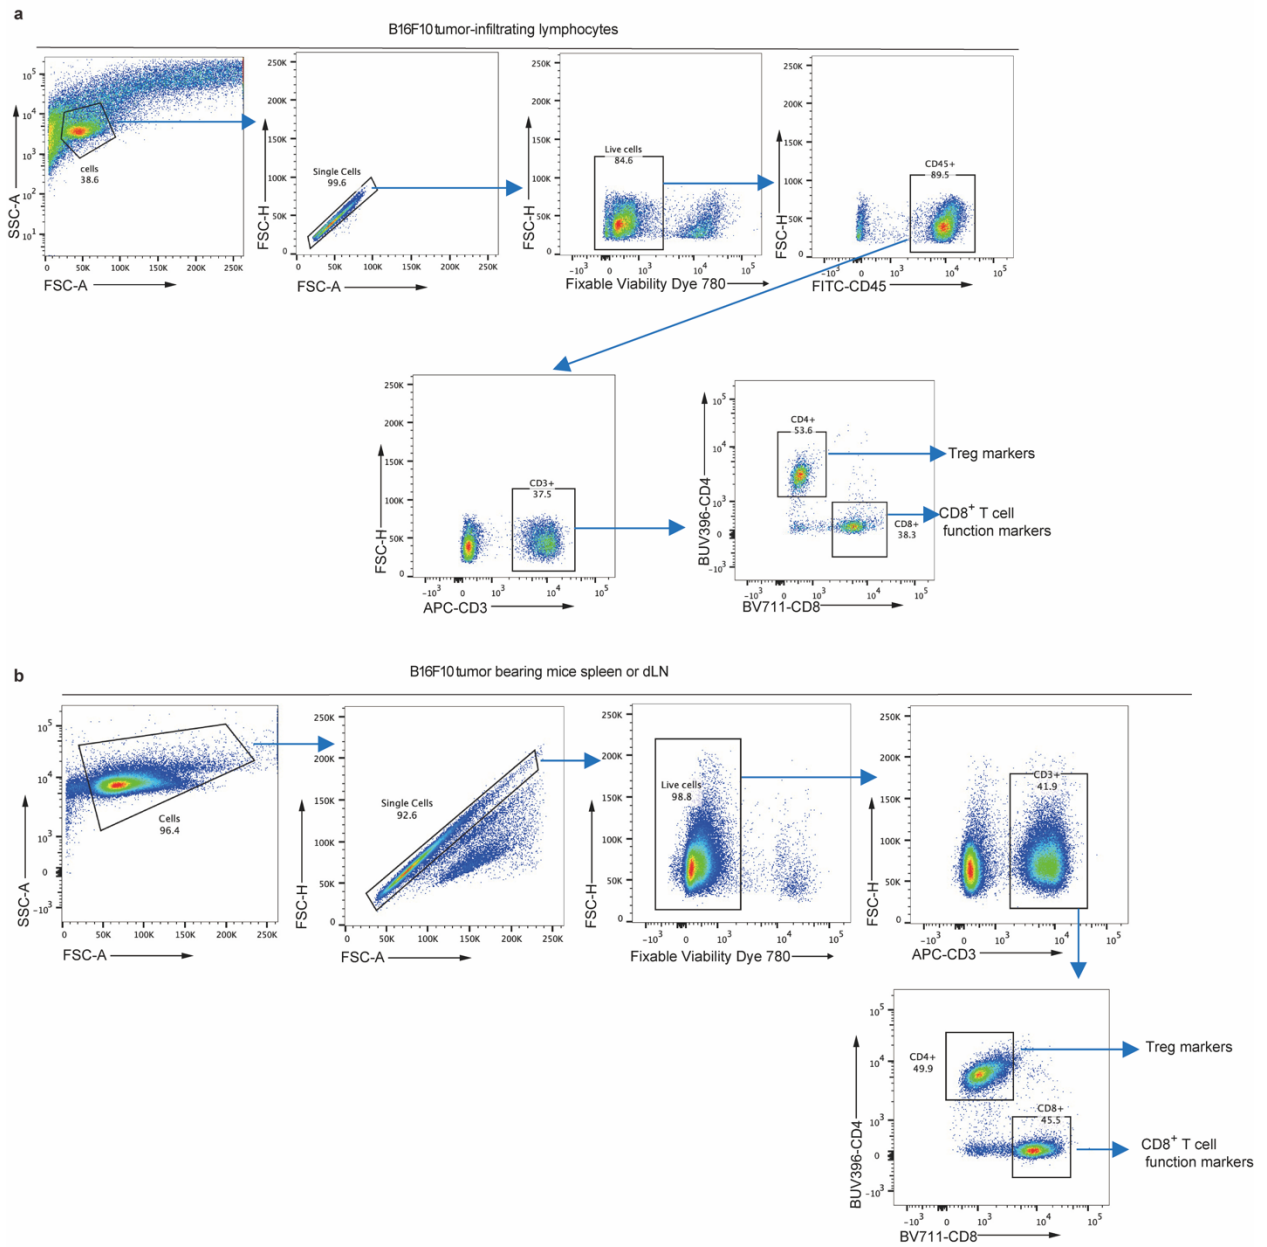

Supplementary Figure 2. Uncropped immunoblot images with size marker indications

Fig. 4c

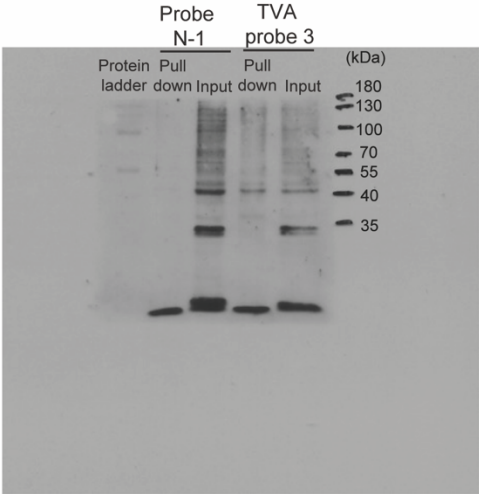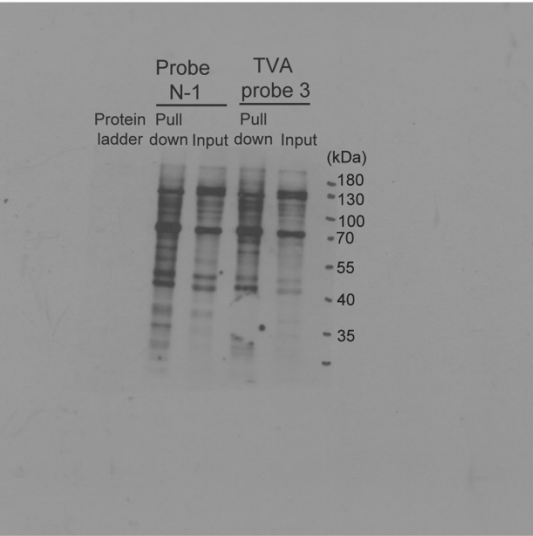

Extended Data Fig. 6e

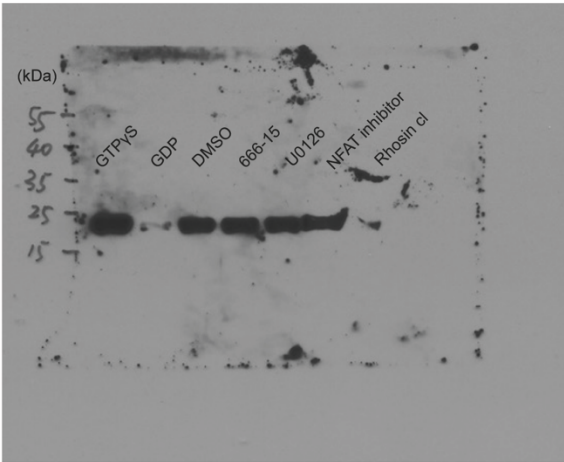

# 1 TVA derivatives and probes synthetic procedures

2

## 3 Synthesis of compound 9

4

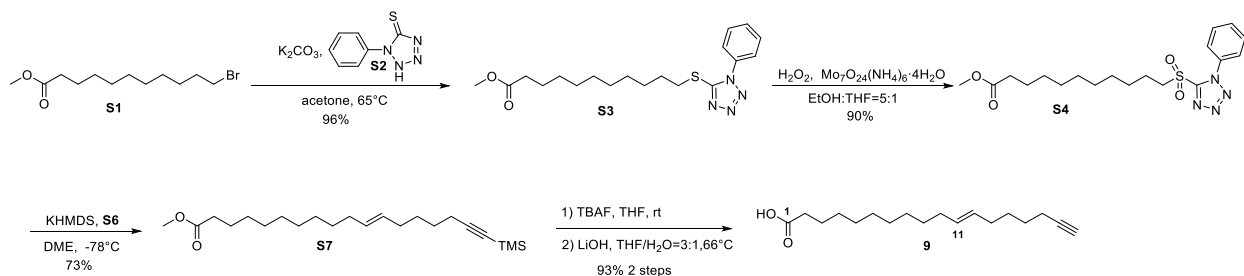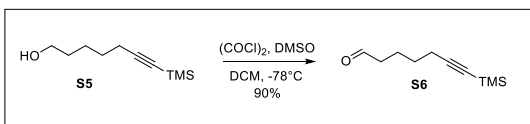

5

## 6 Scheme 1. Synthesis of compound 9

7

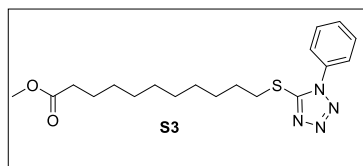

8

9 The bromide **S1** (1.0 g, 3.6 mmol) was added to a stirred solution of 1- phenyl-1H-tetrazol-5-thiol **S2**  
10 (1.14 g, 6.4 mmol) and potassium carbonate (1.0 g, 7.2 mmol) in acetone (20 mL) at room temperature.  
11 The mixture was heated to 65°C and stirred for 2.5 h, then cooled to room temperature, the mixture  
12 was filtered, then the solvent was evaporated, and the residue was diluted with a mixture of DCM (100  
13 mL) and water (20 mL). The organic layer was separated, and the aqueous layer was extracted with the  
14 DCM (2×50 mL). The combined organic layers were dried over NaSO<sub>4</sub> and evaporated. Silica gel  
15 column chromatography (EtOAc: hexane =1:6) gave a white solid (1.4 g, 96%). Obtained  
16 characterization data were in agreement with those published in the literature<sup>1</sup>.

17

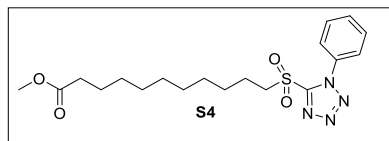

18

19 To a solution of sulfide **S3** (500 mg, 1.2 mmol) in EtOH/THF = 5:1 (12 mL) was added a solution of  
20 (NH<sub>4</sub>)<sub>6</sub>Mo<sub>7</sub>O<sub>24</sub>·4H<sub>2</sub>O (293.8 mg, 0.23 mmol) in H<sub>2</sub>O<sub>2</sub> (2.6 mL, 30%) at 0 °C. The reaction was stirred  
21 at room temperature overnight and quenched with H<sub>2</sub>O (5.0 mL). The mixture was extracted with DCM  
22 (3×20 mL). The combined organic phases were dried over Na<sub>2</sub>SO<sub>4</sub> and evaporated. Purification by  
23 silica gel column chromatography (EtOAc: hexane = 1:5) gave a white solid (448 mg, 90%). Obtained  
24 characterization data were in agreement with those published in the literature<sup>1</sup>.

25

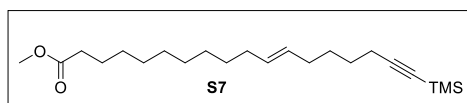

26

27 To a stirred solution of the **S4** (100 mg, 0.25 mmol) in DME (1.6 mL) at -78°C under nitrogen was  
 28 added dropwise the KHMDS (0.5 M in toluene, 0.54 mL, 0.27 mmol). The mixture was then stirred for  
 29 30 min before addition of the aldehyde **S6** (prepared as reported, 45 mg, 0.25 mmol). After stirring for  
 30 a further 1 h at -78°C the reaction mixture was quenched with sat. NH<sub>4</sub>Cl (1.0 mL), then the mixture  
 31 was extracted with EtOAc (3×10 mL). The combined organic phases were dried over Na<sub>2</sub>SO<sub>4</sub> and  
 32 evaporated. Purification by silica gel column chromatography (EtOAc: hexane = 100:1) gave a  
 33 colourless oil (65 mg, 73%). <sup>1</sup>H NMR (400 MHz, CDCl<sub>3</sub>) δ 5.38 (q, *J* = 5.1 Hz, 2H), 3.66 (s, 3H), 2.29  
 34 (t, *J* = 7.5 Hz, 2H), 2.21 (t, *J* = 6.9 Hz, 2H), 1.97 (h, *J* = 5.7 Hz, 4H), 1.60 (m, 2H), 1.56 – 1.37 (m, 4H),  
 35 1.28 (m, 12H), 0.14 (s, 9H). <sup>13</sup>C NMR (101 MHz, CDCl<sub>3</sub>) δ 174.5, 130.9, 129.9, 107.8, 84.4, 51.6, 34.3,  
 36 32.7, 32.1, 29.7, 29.6, 29.5, 29.4, 29.3, 29.3, 28.9, 28.2, 25.1, 19.9, 0.3.

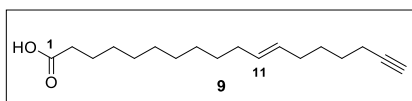

38  
 39 To a solution of sulfide **S7** (21 mg, 0.057 mmol) in THF (2.0 mL) was added a solution of TBAF (1.0  
 40 M in THF, 86 μL, 0.086 mmol) at room temperature. The reaction was stirred at room temperature for  
 41 30 min then quenched with H<sub>2</sub>O (2.0 mL). The mixture was extracted with EtOAc (3×10 mL). The  
 42 combined organic phases were dried over Na<sub>2</sub>SO<sub>4</sub> and concentrated in vacuo to yield the product which  
 43 was used directly in the follow reaction. The above product was dissolved in THF: H<sub>2</sub>O=3:1 (0.8 mL),  
 44 then LiOH (14 mg, 0.34 mmol) was added into the above solution, heated the mixture to 66°C and  
 45 stirred for 3 h, cooled to room temperature, 2M HCl was added to the mixture to adjust the pH to 2,  
 46 then the mixture was extracted with EtOAc (3×5.0 mL). The combined organic phases were dried over  
 47 Na<sub>2</sub>SO<sub>4</sub> and evaporated. Purification by silica gel column chromatography (EtOAc: hexane = 1:5) gave  
 48 a white solid (15 mg, 93% for 2 steps). <sup>1</sup>H NMR (400 MHz, CDCl<sub>3</sub>) δ 5.48 – 5.27 (m, 2H), 2.35 (t, *J* =  
 49 7.5 Hz, 2H), 2.18 (td, *J* = 6.9, 2.7 Hz, 2H), 2.08 – 1.91 (m, 5H), 1.69 – 1.58 (m, 2H), 1.57 – 1.40 (m,  
 50 4H), 1.39 – 1.27 (m, 12H). <sup>13</sup>C NMR (101 MHz, CDCl<sub>3</sub>) δ 180.2, 131.0, 129.8, 84.8, 68.3, 34.2, 32.7,  
 51 32.1, 29.8, 29.7, 29.6, 29.5, 29.4, 29.3, 29.2, 28.8, 28.1, 24.8, 18.4. HRMS-ESI (m/z): calcd. for  
 52 C<sub>18</sub>H<sub>30</sub>O<sub>2</sub>H<sup>+</sup> [M+H]<sup>+</sup> : 279.2319, found 279.2317.

## 54 Synthesis of compound 10

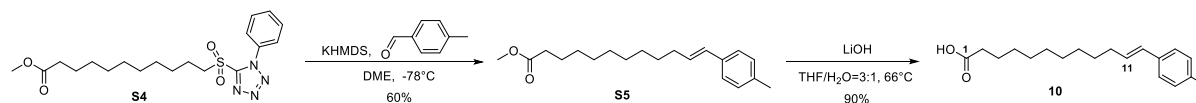

## 57 Scheme 2. Synthesis of compound 10

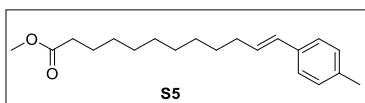

60  
 61 To a stirred solution of the **S4** (50 mg, 0.12 mmol) in DME (1.6 mL) at -78°C under nitrogen was added  
 62 dropwise the KHMDS (0.5 M in toluene, 0.27 mL, 0.14 mmol) The mixture was then stirred for 30 min  
 63 before addition of the p-tolualdehyde (16 mg, 0.27 mmol). After stirring for a further 1 h at -78°C the  
 64 reaction mixture was quenched with sat. NH<sub>4</sub>Cl (1.0 mL), then the mixture was extracted with EtOAc  
 65 (3×10 mL). The combined organic phases were dried over Na<sub>2</sub>SO<sub>4</sub> and evaporated. Purification by  
 66 silica gel column chromatography (EtOAc: hexane = 60:1) gave a colorless oil (22 mg, 60%).

67

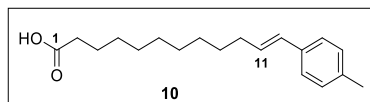

68  
69 The above product **S5** (12 mg, 0.039mmol) was dissolved in THF:H<sub>2</sub>O=3:1 (0.8 mL), then LiOH (7.0  
70 mg, 0.16 mmol) was added into the above solution, heated the mixture to 66°C and stirred for 3 h,  
71 cooled to room temperature, 2M HCl was added to the mixture to adjust the pH to 2, then the mixture  
72 was extracted with EtOAc (3×5.0 mL). The combined organic phases were dried over Na<sub>2</sub>SO<sub>4</sub> and  
73 evaporated. Purification by silica gel column chromatography (EtOAc: hexane = 1:6) gave a white solid  
74 (10 mg, 90%). <sup>1</sup>H NMR (400 MHz, CDCl<sub>3</sub>) δ 7.23 (d, *J* = 7.9 Hz, 2H), 7.09 (d, *J* = 7.8 Hz, 2H), 6.34  
75 (d, *J* = 15.8 Hz, 1H), 6.16 (dt, *J* = 15.8, 6.9 Hz, 1H), 2.36 (d, *J* = 7.6 Hz, 2H), 2.32 (d, *J* = 2.9 Hz, 3H),  
76 2.18 (q, *J* = 6.5 Hz, 2H), 1.63 (p, *J* = 7.4 Hz, 2H), 1.45 (p, *J* = 7.0 Hz, 2H), 1.30 (s, 10H). <sup>13</sup>C NMR  
77 (101 MHz, CDCl<sub>3</sub>) δ 179.6, 136.6, 135.3, 130.3, 129.7, 129.3, 125.9, 34.1, 33.2, 29.9, 29.6, 29.6, 29.4,  
78 29.3, 29.2, 24.8, 21.3. HRMS-ESI (m/z): calcd. for C<sub>19</sub>H<sub>28</sub>O<sub>2</sub>H<sup>+</sup> [M+H]<sup>+</sup> : 289.2162, found 289.2149.

79

80 **Synthesis of compound 11**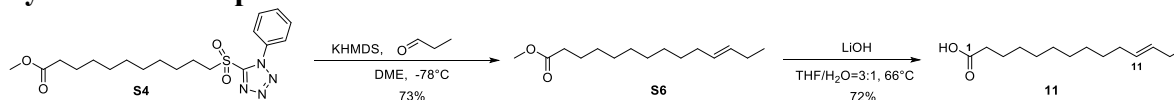

81

82 **Scheme 3. Synthesis of compound 11**

83

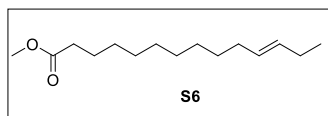

84  
85 To a stirred solution of the **S4** (100 mg, 0.25 mmol) in DME (1.6 mL) at -78°C under nitrogen was  
86 added dropwise the KHMDS (0.5 M in toluene, 0.54 mL, 0.28 mmol) The mixture was then stirred for  
87 30 min before addition of the propionaldehyde (16 mg, 0.27 mmol). After stirring for a further 1 h at -  
88 78°C the reaction mixture was quenched with sat. NH<sub>4</sub>Cl (1.0 mL), then the mixture was extracted with  
89 EtOAc (3×10 mL). The combined organic phases were dried over Na<sub>2</sub>SO<sub>4</sub> and evaporated. Purification  
90 by silica gel column chromatography (EtOAc: hexane = 1:60) gave a colorless oil (43 mg, 73%).<sup>1</sup>H  
91 NMR (400 MHz, CDCl<sub>3</sub>) δ 5.49 – 5.30 (m, 2H), 3.66 (s, 3H), 2.29 (t, *J* = 7.5 Hz, 2H), 1.98 (dq, *J* =  
92 14.8, 6.9, 5.1 Hz, 4H), 1.61 (h, *J* = 7.5 Hz, 2H), 1.38 – 1.20 (m, 12H), 1.02 – 0.85 (m, 3H). <sup>13</sup>C NMR  
93 (101 MHz, CDCl<sub>3</sub>) δ 174.5, 132.0, 129.5, 51.6, 34.3, 32.7, 29.8, 29.6, 29.5, 29.4, 29.3, 29.3, 25.7, 25.1,  
94 14.1. HRMS-ESI (m/z): calcd. for C<sub>15</sub>H<sub>28</sub>O<sub>2</sub>Na<sup>+</sup> [M+Na]<sup>+</sup> : 263.1982, found 263.1978.

95

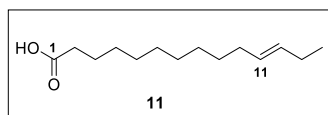

96  
97 The above product **S6** (28 mg, 0.12mmol) was dissolved in THF:H<sub>2</sub>O=3:1 (1.2 mL), then LiOH (20  
98 mg, 0.46 mmol) was added into the above solution, heated the mixture to 66°C and stirred for 3 h,  
99 cooled to room temperature, 2M HCl was added to the mixture to adjust the pH to 2, then the mixture  
100 was extracted with EtOAc (3×5.0 mL). The combined organic phases were dried over Na<sub>2</sub>SO<sub>4</sub> and  
101 evaporated. Purification by silica gel column chromatography (EtOAc : hexane = 1:10 - 1:5 - 1:1) gave  
102 a white solid (20 mg, 72%).<sup>1</sup>H NMR (400 MHz, CDCl<sub>3</sub>) δ 5.50 – 5.31 (m, 2H), 2.35 (t, *J* = 7.5 Hz, 2H),  
103 1.98 (dq, *J* = 13.9, 7.2 Hz, 4H), 1.63 (p, *J* = 7.3 Hz, 2H), 1.40 – 1.26 (m, 12H), 0.96 (t, *J* = 7.4 Hz, 3H).

104  $^{13}\text{C}$  NMR (101 MHz,  $\text{CDCl}_3$ )  $\delta$  180.4, 132.0, 129.5, 34.2, 32.7, 29.9, 29.8, 29.6, 29.5, 29.4, 29.3, 29.2,  
105 25.7, 24.8, 14.1. . HRMS-ESI (m/z): calcd. for  $\text{C}_{14}\text{H}_{26}\text{O}_2\text{H}^+$   $[\text{M}+\text{H}]^+$  : 249.1825, found 249.1821.

106  
107  
108

### Synthesis of compound 13

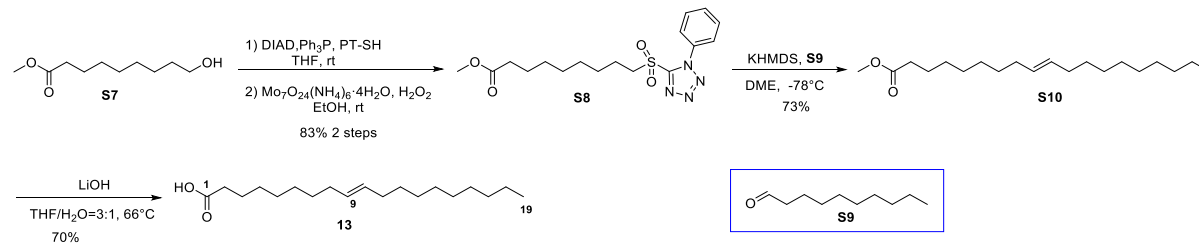

### Scheme 4. Synthesis of compound 13

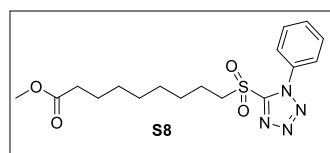

112  
113 A solution of PT-SH (568 mg, 3.2 mmol),  $\text{PPh}_3$  (836 mg, 3.2 mmol) and alcohol **S7** (500 mg, 2.7 mmol)  
114 in THF (13 mL) and DEAD (644 mg, 3.2 mmol) was added. The resulting solution was stirred for 3 h  
115 at room temperature. The resulting solution was diluted with EtOH (20 mL), cooled to  $0^\circ\text{C}$  and  
116  $(\text{NH}_4)_6\text{Mo}_7\text{O}_{24}\cdot 4\text{H}_2\text{O}$  (641 mg, 0.51 mmol) in  $\text{H}_2\text{O}_2$  (5.8 mL, 30%) were added. The resulting  
117 yellowish solution was allowed to warm to room temperature and stirred for 10 h. Water (20 mL) was  
118 added and the whole mixture was extracted with EtOAc (3x100 mL). The combined organic layers  
119 were washed with brine (20 mL), dried over  $\text{Na}_2\text{SO}_4$ , filtered and the solvents were evaporated under  
120 reduced pressure. Purification by silica gel column chromatography (EtOAc : hexane = 1:5) gave a  
121 white solid (900 mg, 83% for 2 steps).  $^1\text{H}$  NMR (400 MHz,  $\text{CDCl}_3$ )  $\delta$  7.70 (ddt,  $J = 7.2, 3.4, 2.5$  Hz,  
122 2H), 7.65 – 7.56 (m, 3H), 3.81 – 3.70 (m, 2H), 3.66 (s, 3H), 2.30 (t,  $J = 7.5$  Hz, 2H), 2.01 – 1.89 (m,  
123 2H), 1.68 – 1.44 (m, 4H), 1.33 (qd,  $J = 8.8, 4.5$  Hz, 6H).  $^{13}\text{C}$  NMR (101 MHz,  $\text{CDCl}_3$ )  $\delta$  174.3, 153.6,  
124 133.2, 131.6, 129.8, 125.2, 56.1, 51.6, 34.1, 29.0, 28.9, 28.8, 28.2, 24.9, 22.1. HRMS-ESI (m/z): calcd.  
125 for  $\text{C}_{17}\text{H}_{24}\text{N}_4\text{O}_4\text{SH}^+$   $[\text{M}+\text{H}]^+$  : 381.1591, found 381.1600.

126

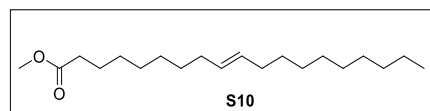

127  
128 Compounds **S10** was synthesized following a similar procedure described for **S6**. Without purified for  
129 the next step.

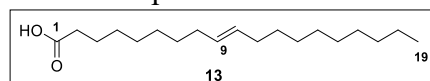

130  
131 Compounds **13** was synthesized following a similar procedure described for **11**. White solid, yield:  
132 70%.  $^1\text{H}$  NMR (400 MHz,  $\text{CDCl}_3$ )  $\delta$  5.41 – 5.34 (m, 2H), 2.34 (t,  $J = 7.5$  Hz, 2H), 1.96 (q,  $J = 6.2$  Hz,  
133 4H), 1.63 (p,  $J = 7.2$  Hz, 2H), 1.44 – 1.15 (m, 22H), 0.88 (t,  $J = 6.7$  Hz, 3H).  $^{13}\text{C}$  NMR (101 MHz,  
134  $\text{CDCl}_3$ )  $\delta$  180.0, 130.5, 130.2, 34.0, 32.6, 32.6, 31.9, 29.7, 29.6, 29.6, 29.6, 29.4, 29.2, 29.1, 29.0, 28.9,  
135 24.7, 22.7, 14.1. HRMS-ESI (m/z): calcd. for  $\text{C}_{19}\text{H}_{36}\text{O}_2\text{H}^+$   $[\text{M}+\text{H}]^+$  : 297.2788, found 297.2777.

136

### Synthesis of compound 14

137

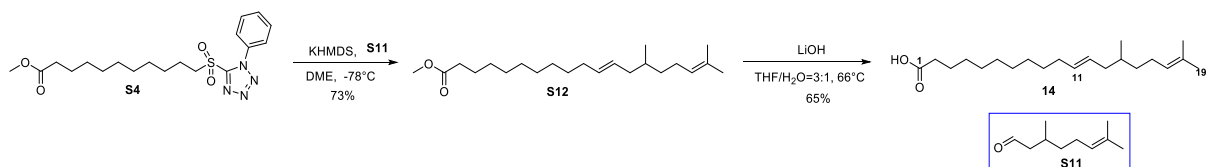

138

139 **Scheme 5. Synthesis of compound 14**

140

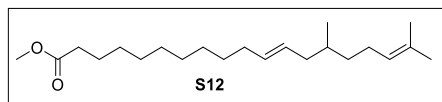

141

142 Compounds **S12** was synthesized following a similar procedure described for **S6**. Without purified for  
 143 the next step.

144

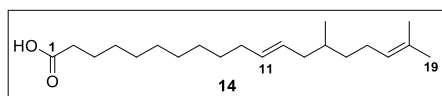

145

146 Compounds **14** was synthesized following a similar procedure described for **11**. White solid, yield:  
 147 65%. <sup>1</sup>H NMR (400 MHz, CDCl<sub>3</sub>) δ 5.44 – 5.29 (m, 2H), 5.10 (ddt, *J* = 8.6, 7.1, 1.4 Hz, 1H), 2.35 (t, *J*  
 148 = 7.5 Hz, 2H), 1.97 (dh, *J* = 10.2, 4.4 Hz, 5H), 1.87 – 1.77 (m, 1H), 1.68 (s, 3H), 1.65 – 1.62 (m, 1H),  
 149 1.60 (s, 3H), 1.49 – 1.40 (m, 1H), 1.37 – 1.24 (m, 16H), 0.86 (d, *J* = 6.6 Hz, 3H). <sup>13</sup>C NMR (101 MHz,  
 150 CDCl<sub>3</sub>) δ 180.0, 131.7, 131.0, 128.7, 125.0, 40.0, 36.6, 34.0, 32.8, 32.6, 29.7, 29.6, 29.4, 29.4, 29.2,  
 151 29.1, 29.1, 25.7, 25.6, 24.7, 19.4, 17.6. HRMS-ESI (*m/z*): calcd. for C<sub>21</sub>H<sub>38</sub>O<sub>2</sub>H<sup>+</sup> [*M*+*H*]<sup>+</sup> : 323.2945,  
 152 found 323.2947.

153

154 **Synthesis of compound 15**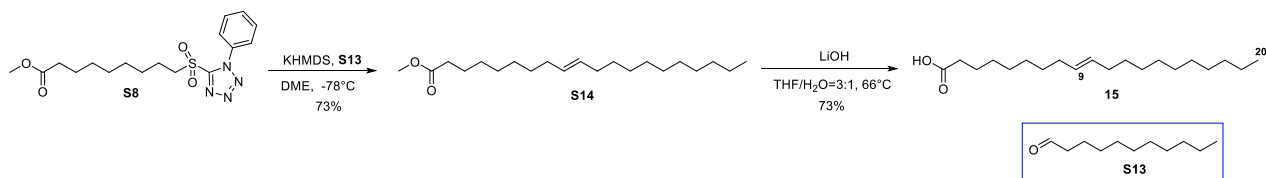

155

156 **Scheme 6. Synthesis of compound 15**

157

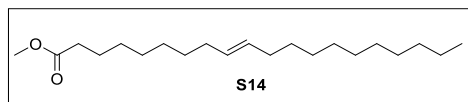

158

159 Compounds **S14** was synthesized following a similar procedure described for **S6**. Without purified for  
 160 the next step.

161

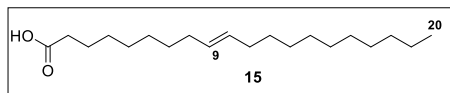

162

163 Compounds **15** was synthesized following a similar procedure described for **11**. White solid, yield:  
 164 73%. <sup>1</sup>H NMR (400 MHz, CDCl<sub>3</sub>) δ 5.42 – 5.34 (m, 2H), 2.40 – 2.30 (m, 2H), 2.01 – 1.92 (m, 4H), 1.63  
 165 (p, *J* = 7.4 Hz, 2H), 1.38 – 1.21 (m, 24H), 0.88 (t, *J* = 1.9 Hz, 3H). <sup>13</sup>C NMR (101 MHz, CDCl<sub>3</sub>) δ  
 166 180.0, 130.5, 130.2, 34.0, 32.6, 32.6, 31.9, 29.7, 29.6, 29.5, 29.4, 29.2, 29.1, 29.0, 28.9, 24.7, 22.7, 14.1.  
 167 HRMS-ESI (*m/z*): calcd. for C<sub>20</sub>H<sub>38</sub>O<sub>2</sub>H<sup>+</sup> [*M*+*H*]<sup>+</sup> : 311.2945, found 311.2938.

168



169 **Synthesis of compound 16**

170

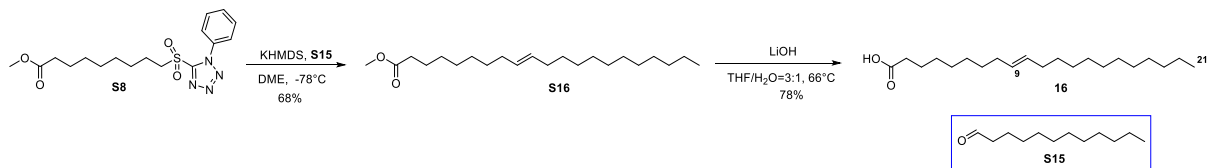

171

172 **Scheme 7. Synthesis of compound 16**

173

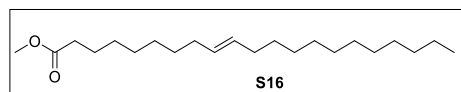

174

175 Compounds **S16** was synthesized following a similar procedure described for **S6**. Without purified for  
176 the next step.

177

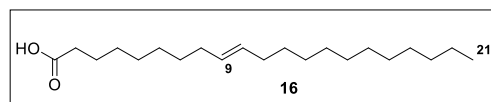

178

179 Compounds **16** was synthesized following a similar procedure described for **11**. White solid, yield:  
180 78%. <sup>1</sup>H NMR (400 MHz, CDCl<sub>3</sub>) δ 5.42 – 5.34 (m, 2H), 2.35 (ddd, *J* = 9.2, 6.7, 1.5 Hz, 2H), 2.01 –  
181 1.92 (m, 4H), 1.63 (p, *J* = 7.4 Hz, 2H), 1.37 – 1.25 (m, 26H), 0.92 – 0.84 (m, 3H). <sup>13</sup>C NMR (101 MHz,  
182 CDCl<sub>3</sub>) δ 179.8, 130.5, 130.2, 34.0, 32.6, 32.6, 31.9, 29.7, 29.7, 29.6, 29.5, 29.4, 29.2, 29.1, 29.0, 28.9,  
183 24.7, 22.7, 14.1. HRMS-ESI (*m/z*): calcd. for C<sub>21</sub>H<sub>40</sub>O<sub>2</sub>H<sup>+</sup> [*M*+H]<sup>+</sup> : 325.3101, found 325.3097.

184

185 **Synthesis of compound 17**

186

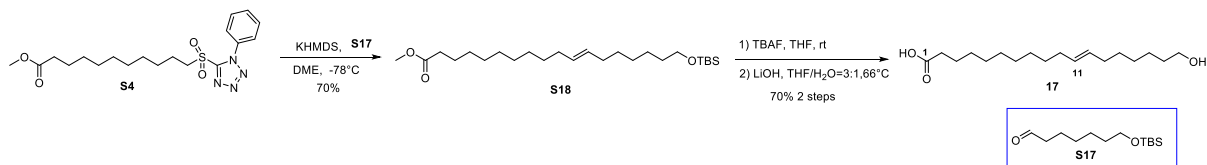

187

188 **Scheme 8. Synthesis of compound 17**

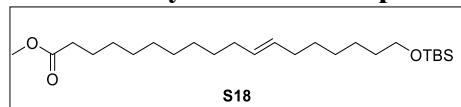

189

190 To a stirred solution of the **S4** (80 mg, 0.20 mmol) in DME (1.3 mL) at -78°C under nitrogen was added  
191 dropwise the KHMDS (0.5 M in toluene, 0.43 mL, 0.22 mmol) The mixture was then stirred for 30 min  
192 before addition of the aldehyde **S17** (prepared as reported, 53 mg, 0.22 mmol). After stirring for a  
193 further 1 h at -78°C the reaction mixture was quenched with sat. NH<sub>4</sub>Cl (1.0 mL), then the mixture was  
194 extracted with EtOAc (3×10 mL). The combined organic phases were dried over Na<sub>2</sub>SO<sub>4</sub> and  
195 evaporated. Without purified for the next step.

196

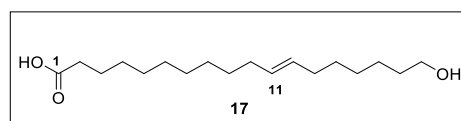

197

198 To a solution of sulfide **S18** (60 mg, 0.15 mmol) in THF (1.5 mL) was added a solution of TBAF (1.0  
199 M in THF, 181 μL, 0.18 mmol) at room temperature. The reaction was stirred at room temperature for

200 30 min then quenched with H<sub>2</sub>O (2.0 mL). The mixture was extracted with EtOAc (3×10 mL). The  
 201 combined organic phases were dried over Na<sub>2</sub>SO<sub>4</sub> and concentrated in vacuo to yield the product which  
 202 was used directly in the follow reaction. The above product was dissolved in THF:H<sub>2</sub>O=3:1 (2.4 mL),  
 203 then LiOH (25 mg, 0.60 mmol) was added into the above solution, heated the mixture to 66°C and  
 204 stirred for 3 h, cooled to room temperature, 2M HCl was added to the mixture to adjust the pH to 2,  
 205 then the mixture was extracted with EtOAc (3×5.0 mL). The combined organic phases were dried over  
 206 Na<sub>2</sub>SO<sub>4</sub> and evaporated. Purification by silica gel column chromatography (EtOAc: hexane = 1:4 - 1:1)  
 207 gave a white solid (31 mg, 70% for 2 steps). <sup>1</sup>H NMR (400 MHz, CDCl<sub>3</sub>) δ 5.43 – 5.32 (m, 2H), 3.64  
 208 (t, *J* = 6.6 Hz, 2H), 2.34 (t, *J* = 7.5 Hz, 2H), 2.04 – 1.92 (m, 4H), 1.69 – 1.51 (m, 5H), 1.41 – 1.20 (m,  
 209 19H). <sup>13</sup>C NMR (101 MHz, CDCl<sub>3</sub>) δ 179.3, 130.5, 130.2, 63.0, 34.0, 32.7, 32.5, 29.6, 29.5, 29.4,  
 210 29.2, 29.0, 29.02, 29.0, 25.6, 24.7. HRMS-ESI (m/z): calcd. for C<sub>18</sub>H<sub>34</sub>O<sub>3</sub>H<sup>+</sup> [M+H]<sup>+</sup>: 299.2581, found  
 211 299.2582.

212  
 213  
 214

### Synthesis of probe-1

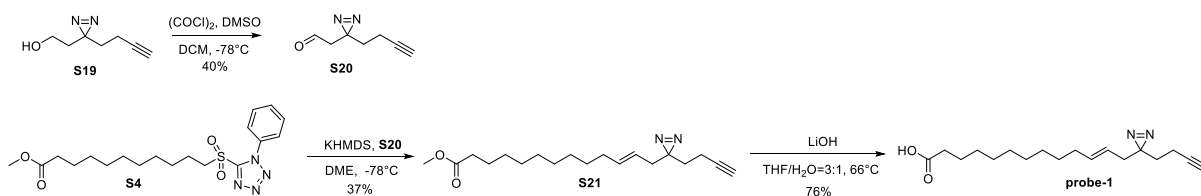

### Scheme 9. Synthesis of probe-1

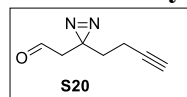

218 Oxalyl chloride (46 μL, 0.54 mmol) was dissolved in 2.0 mL DCM and brought to -78 °C. A solution  
 219 of DMSO (78 μL, 1.08 mmol) in DCM (1.0 mL) was added dropwise, and the reaction was allowed to  
 220 stir for 15 min. A solution of the alcohol **S19** (50 mg, 0.36 mmol) in DCM (1.0 mL) was added dropwise,  
 221 and the reaction was allowed to stir an additional 15 min. Then Et<sub>3</sub>N (300 μL, 2.2 mmol) was added  
 222 dropwise. After 15 min, the reaction was allowed to warm to room temperature. The reaction mixture  
 223 was transferred to a separatory funnel and washed with H<sub>2</sub>O (2 mL). The phases were separated, and  
 224 the aqueous phase was extracted with DCM (3×5.0 mL). The combined organic extracts were dried  
 225 over Na<sub>2</sub>SO<sub>4</sub>, and concentrated. Purification by silica gel column chromatography (EtOAc: hexane =  
 226 1:6) gave a brown oil (20 mg, 40%). <sup>1</sup>H NMR (400 MHz, CDCl<sub>3</sub>) δ 9.74 (s, 1H), 2.46 (d, *J* = 1.6 Hz,  
 227 2H), 2.06 (td, *J* = 7.3, 2.7 Hz, 2H), 2.01 (d, *J* = 2.6 Hz, 1H), 1.73 (t, *J* = 7.2 Hz, 2H). <sup>13</sup>C NMR (101  
 228 MHz, CDCl<sub>3</sub>) δ 197.5, 82.5, 69.8, 48.4, 32.4, 24.5, 13.3.

229

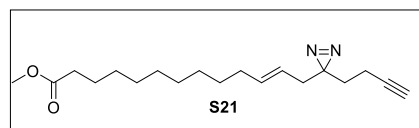

231 To a stirred solution of the **S4** (40 mg, 0.10 mmol) in DME (0.50 mL) at -78°C under nitrogen was  
 232 added dropwise the KHMDS (0.5 M in toluene, 0.19 mL, 0.10 mmol) The mixture was then stirred for  
 233 30 min before addition of the aldehyde **S20** (12 mg, 0.09 mmol). After stirring for a further 1 h at -  
 234 78°C the reaction mixture was quenched with sat. NH<sub>4</sub>Cl (1.0 mL), then the mixture was extracted with  
 235 EtOAc (3×10 mL). The combined organic phases were dried over Na<sub>2</sub>SO<sub>4</sub> and evaporated. Purification  
 236 by silica gel column chromatography (EtOAc: hexane = 1:30) gave a colorless oil (10 mg, 37%). <sup>1</sup>H  
 237 NMR (400 MHz, CDCl<sub>3</sub>) δ 5.56 – 5.42 (m, 1H), 5.25 – 5.12 (m, 1H), 3.66 (s, 3H), 2.30 (t, *J* = 7.6 Hz,

238 2H), 2.08 – 1.89 (m, 6H), 1.68 – 1.54 (m, 4H), 1.44 – 1.12 (m, 13H). <sup>13</sup>C NMR (101 MHz, CDCl<sub>3</sub>) δ  
 239 174.5, 135.5, 122.1, 83.0, 69.1, 51.6, 37.0, 34.3, 32.7, 31.9, 29.5, 29.4, 29.3, 29.2, 28.3, 25.1, 13.4.  
 240 HRMS-ESI (m/z): calcd. for C<sub>19</sub>H<sub>30</sub>N<sub>2</sub>O<sub>2</sub>H<sup>+</sup> [M+H]<sup>+</sup> : 319.2380, found 319.2381.  
 241

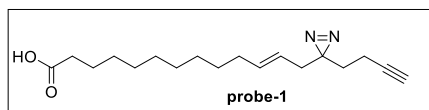

242  
 243 The above product **S21** (10 mg, 0.031mmol) was dissolved in THF:H<sub>2</sub>O=3:1 (0.40 mL), then LiOH  
 244 (5.4 mg, 0.13 mmol) was added into the above solution, heated the mixture to 66°C and stirred for 3 h,  
 245 cooled to room temperature, 2M HCl was added to the mixture to adjust the pH to 2, then the mixture  
 246 was extracted with EtOAc (3×5.0 mL). The combined organic phases were dried over Na<sub>2</sub>SO<sub>4</sub> and  
 247 evaporated. Purification by silica gel column chromatography (EtOAc : hexane = 1:3) gave a white  
 248 solid (7.6 mg, 76%). <sup>1</sup>H NMR (400 MHz, CDCl<sub>3</sub>) δ 5.49 (dt, *J* = 15.3, 6.6 Hz, 1H), 5.25 – 5.13 (m, 1H),  
 249 2.35 (t, *J* = 7.5 Hz, 2H), 2.09 – 1.89 (m, 6H), 1.63 (td, *J* = 7.5, 3.9 Hz, 4H), 1.42 – 1.25 (m, 13H). <sup>13</sup>C  
 250 NMR (101 MHz, CDCl<sub>3</sub>) δ 179.7, 135.5, 122.1, 83.0, 69.1, 37.0, 32.7, 31.9, 29.8, 29.5, 29.5, 29.4, 29.3,  
 251 29.20, 28.3, 24.8, 13.4. HRMS-ESI (m/z): calcd. for C<sub>18</sub>H<sub>28</sub>N<sub>2</sub>O<sub>2</sub>H<sup>+</sup> [M+H]<sup>+</sup> : 305.2224, found  
 252 305.2220.

## 253 Synthesis of probe-2

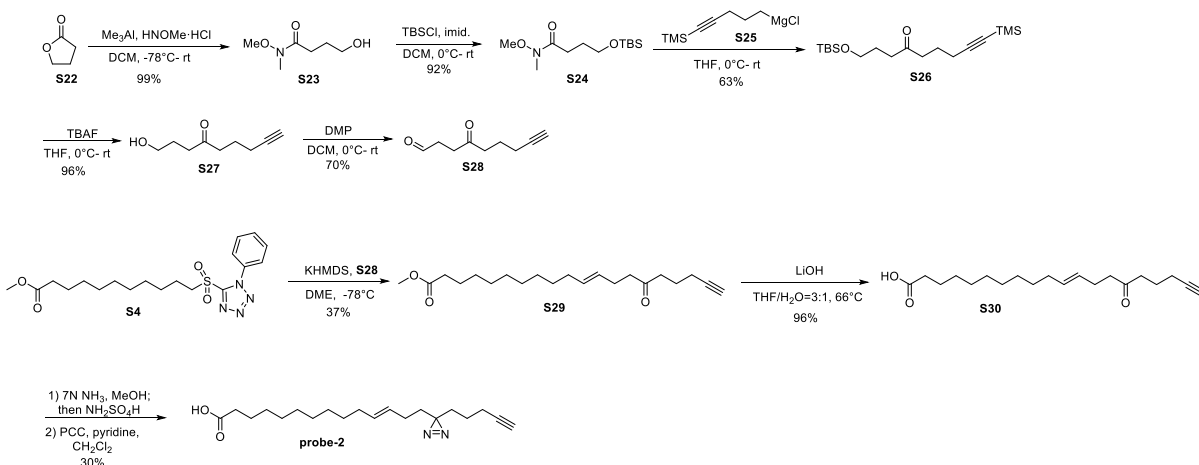

256  
 257 **Scheme 10. Synthesis of probe-2**  
 258

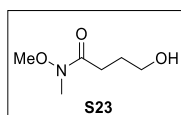

259  
 260 Trimethylaluminium (66 mL, 132 mmol, 2.0 M in toluene) was added over 1 h to a solution of N,O-  
 261 dimethylhydroxylamine hydrochloride (13.6 g, 139.4 mmol) in DCM (50 mL) at -78 °C. The solution  
 262 was warmed to room temperature and stirred for 4 h. The solution was then cooled to -5 °C, γ-  
 263 butyrolactone **S22** (4.4 ml, 57.2 mmol) was added and the resulting mixture stirred for a further 1.5 h.  
 264 After this time, the solution was carefully quenched at 0 °C by addition of a solution of potassium  
 265 sodium L-tartrate tetrahydrate (16 g) in water (20 mL) and stirred overnight. The resulting precipitate  
 266 was filtered through a plug of Celite and washed with DCM. The organic phase was dried over Na<sub>2</sub>SO<sub>4</sub>,

267 filtered, and the solvent removed in vacuo to give a light yellow oil (8.31 g, 99%). Obtained  
268 characterization data were in agreement with those published in the literature<sup>2</sup>.  
269

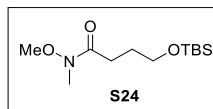

270  
271 To a solution of **S23** (3.4 g, 23.2 mmol) and imidazole (2.4 g, 34.8 mmol) in DCM (70 mL) was added  
272 TBSCl (3.8 g, 25.5 mmol) at 0 °C. The mixture was stirred at rt for 3 h. The mixture was then quenched  
273 by addition of H<sub>2</sub>O (15 mL), and extracted with DCM (3 × 30 mL). The combined organic layers were  
274 washed with brine, dried over Na<sub>2</sub>SO<sub>4</sub>, and concentrated. The residue was purified by silica gel  
275 chromatography (EtOAc : hexane = 1:3) gave a colorless oil (5.6 g, 92%). Obtained characterization  
276 data were in agreement with those published in the literature<sup>2</sup>.  
277

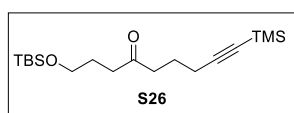

278  
279 **Synthesis of (5-(trimethylsilyl)pent-4-yn-1-yl)magnesium chloride.** This compound was prepared  
280 by following the reported procedure. Magnesium turnings (206 mg, 8.6 mmol) were etched with the  
281 back of a glass pipette and added to a flame-dried, two-neck RBF containing a stir bar and fitted with  
282 an oven-dried reflux condenser. After purging the reaction vessel with argon, a small bead of I<sub>2</sub> was  
283 added to the magnesium turnings followed by anhydrous THF (3.0 mL) and the resulting mixture was  
284 stirred for 15 min at room temperature. A few drops of (5-chloropent-1-yn-1-yl)trimethylsilane (1.0 g,  
285 5.7 mmol) dissolved in anhydrous THF (7.0 mL) was then added to the mixture and the mixture was  
286 heated to reflux. The remaining (5-chloropent-1-yn-1-yl)trimethylsilane solution was then slowly added  
287 to the refluxing reaction mixture over 30 min. When the addition was complete, the reaction was  
288 refluxed for an additional 3 h before cooling to room temperature.  
289

290 Compound **S24** (1.5 g, 5.7 mmol) was dissolved in anhydrous THF (30 mL) and cooled to 0 °C under  
291 N<sub>2</sub>. The above fresh prepared (5-(Trimethylsilyl)pent-4-yn-1-yl)magnesium chloride **S25** was then  
292 added dropwise and stirring for an additional 1 h at room temperature,. After stirring for 1 h, the reaction  
293 was quenched with the addition of sat. NH<sub>4</sub>Cl (aq.) (10 mL) and the product was extracted with EtOAc  
294 (3 × 30 mL). The combined organic layers were washed with brine, then dried over Na<sub>2</sub>SO<sub>4</sub> and  
295 concentrated under reduced pressure. The residue was purified by silica gel chromatography (EtOAc :  
296 hexane = 1:20) gave a yellow oil (1.2 g, 63%).<sup>1</sup>H NMR (400 MHz, CDCl<sub>3</sub>) δ 3.60 (td, *J* = 5.7, 2.3 Hz,  
297 2H), 2.59 – 2.45 (m, 4H), 2.25 (tt, *J* = 6.9, 1.2 Hz, 2H), 1.84 – 1.71 (m, 4H), 0.88 (s, 9H), 0.14 (s, 9H),  
298 0.03 (s, 6H). <sup>13</sup>C NMR (101 MHz, CDCl<sub>3</sub>) δ 210.2, 106.2, 85.2, 62.0, 41.1, 39.1, 26.7, 25.8, 22.3, 19.1,  
299 18.2, -0.1, -5.5. HRMS-ESI (*m/z*): calcd. for C<sub>18</sub>H<sub>36</sub>O<sub>2</sub>Si<sub>2</sub>H<sup>+</sup> [*M*+*H*]<sup>+</sup> : 341.2327, found 341.2331.  
300

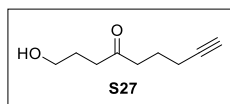

301  
302 To a solution of **S26** (300 mg, 0.88 mmol) in THF (5.0 mL) was added a solution of TBAF (1.0 M in  
303 THF, 2.2 mL, 2.2 mmol) at room temperature. The reaction was stirred at room temperature for 30 min  
304 then quenched with H<sub>2</sub>O (5.0 mL). The mixture was extracted with EtOAc (3×20 mL). The combined  
305 organic phases were washed with brine, dried over Na<sub>2</sub>SO<sub>4</sub> and concentrated in vacuo. The residue was  
306 purified by silica gel chromatography (EtOAc : hexane = 1:1) gave a yellow oil (130 mg, 96%).<sup>1</sup>H

307 NMR (400 MHz, CDCl<sub>3</sub>) δ 3.64 (td, *J* = 6.1, 1.8 Hz, 2H), 2.59 (dtd, *J* = 8.9, 7.1, 1.7 Hz, 4H), 2.24 (ddd,  
308 *J* = 7.0, 4.7, 2.2 Hz, 2H), 2.16 (s, 1H), 1.97 (q, *J* = 2.1 Hz, 1H), 1.91 – 1.74 (m, 4H). <sup>13</sup>C NMR (101  
309 MHz, CDCl<sub>3</sub>) δ 210.9, 83.6, 69.1, 62.2, 41.2, 39.6, 26.5, 22.2, 17.7. HRMS-ESI (*m/z*): calcd. for  
310 C<sub>9</sub>H<sub>14</sub>O<sub>2</sub>H<sup>+</sup> [*M*+H]<sup>+</sup> : 155.1067, found 155.1067.  
311

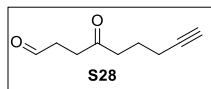

312 Dess-Martin reagent (99 mg, 0.23 mmol) was added to the solution of S27 (30 g, 0.2 mmol) in DCM  
313 (2.0 mL) at 0°C, and the mixture was stirred at room temperature for 4 hours. The reaction mixture was  
314 quenched with saturated Na<sub>2</sub>S<sub>2</sub>O<sub>3</sub> : NaHCO<sub>3</sub> = 1:1 (5 mL), and the product was extracted with DCM  
315 (3×10 mL). The organic layer was washed with brine and dried over Na<sub>2</sub>SO<sub>4</sub>, concentrated in vacuo.  
316 The residue was purified by silica gel chromatography (EtOAc : hexane = 1:4) gave a yellow oil (20  
317 mg, 70%). <sup>1</sup>H NMR (400 MHz, CDCl<sub>3</sub>) δ 9.80 (s, 1H), 2.76 (p, *J* = 2.8 Hz, 4H), 2.64 (td, *J* = 7.2, 2.8  
318 Hz, 2H), 2.24 (tt, *J* = 6.9, 2.3 Hz, 2H), 2.01 – 1.93 (m, 1H), 1.88 – 1.75 (m, 2H). <sup>13</sup>C NMR (101 MHz,  
319 CDCl<sub>3</sub>) δ 208.0, 200.4, 83.5, 69.1, 41.0, 37.5, 34.8, 22.3, 17.7. HRMS-ESI (*m/z*): calcd. for  
320 C<sub>9</sub>H<sub>12</sub>O<sub>2</sub>Na<sup>+</sup> [*M*+Na]<sup>+</sup> : 175.0730, found 175.0735.  
321  
322

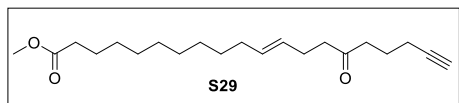

323 To a stirred solution of the S4 (54 mg, 0.13 mmol) in DME (2.0 mL) at -78°C under nitrogen was added  
324 dropwise the KHMDS (0.5 M in toluene, 0.26 mL, 0.13 mmol) The mixture was then stirred for 30 min  
325 before addition of the aldehyde S28 (20 mg, 0.13 mmol). After stirring for a further 1 h at -78°C the  
326 reaction mixture was quenched with sat. NH<sub>4</sub>Cl (2.0 mL), then the mixture was extracted with EtOAc  
327 (3×10 mL). The combined organic phases were washed with brine, dried over Na<sub>2</sub>SO<sub>4</sub> and evaporated.  
328 Purification by silica gel column chromatography (EtOAc: hexane = 1:10) gave a yellow oil (16 mg,  
329 37%). <sup>1</sup>H NMR (400 MHz, CDCl<sub>3</sub>) δ 5.49 – 5.29 (m, 2H), 3.66 (s, 3H), 2.63 – 2.52 (m, 2H), 2.47 (t, *J*  
330 = 7.4 Hz, 2H), 2.34 – 2.16 (m, 6H), 2.06 – 1.90 (m, 3H), 1.79 (pd, *J* = 7.0, 1.0 Hz, 2H), 1.62 (p, *J* = 6.5  
331 Hz, 2H), 1.37 – 1.23 (m, 12H). <sup>13</sup>C NMR (101 MHz, CDCl<sub>3</sub>) δ 209.9, 174.3, 131.6, 128.2, 83.6, 69.0,  
332 51.4, 42.8, 41.1, 34.1, 32.5, 29.5, 29.4, 29.4, 29.3, 29.1, 29.1, 26.9, 25.0, 22.2, 17.8. HRMS-ESI (*m/z*):  
333 calcd. for C<sub>21</sub>H<sub>34</sub>O<sub>3</sub>H<sup>+</sup> [*M*+H]<sup>+</sup> : 335.2581, found 335.2584.  
334  
335

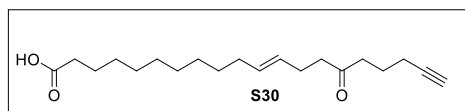

336 The above product S29 (16 mg, 0.048mmol) was dissolved in THF:H<sub>2</sub>O=3:1 (0.40 mL), then LiOH  
337 (8.0 mg, 0.19 mmol) was added into the above solution, heated the mixture to 66°C and stirred for 3 h,  
338 cooled to room temperature, 2M HCl was added to the mixture to adjust the pH to 2, then the mixture  
339 was extracted with EtOAc (3×5.0 mL). The combined organic phases were washed with brine, dried  
340 over Na<sub>2</sub>SO<sub>4</sub> and evaporated. Purification by silica gel column chromatography (EtOAc : hexane = 1:10)  
341 gave a white solid (15 mg, 96%). <sup>1</sup>H NMR (400 MHz, CDCl<sub>3</sub>) δ 5.49 – 5.31 (m, 2H), 2.55 (t, *J* = 7.3  
342 Hz, 2H), 2.48 (t, *J* = 7.5 Hz, 2H), 2.35 (t, *J* = 5.8 Hz, 2H), 2.30 – 2.16 (m, 4H), 2.06 – 1.90 (m, 3H),  
343 1.85 – 1.73 (m, 2H), 1.63 (p, *J* = 7.6 Hz, 2H), 1.41 – 1.24 (m, 12H). <sup>13</sup>C NMR (101 MHz, CDCl<sub>3</sub>) δ  
344 210.0, 179.9, 131.6, 128.2, 83.6, 69.0, 42.8, 41.1, 34.0, 32.5, 29.4, 29.4, 29.4, 29.2, 29.1, 29.1, 26.9,  
345 24.7, 22.2, 17.8. HRMS-ESI (*m/z*): calcd. for C<sub>18</sub>H<sub>32</sub>O<sub>3</sub>H<sup>+</sup> [*M*+H]<sup>+</sup> : 321.2424, found 321.2424.  
346  
347

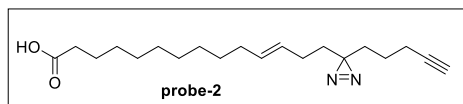

348  
 349 Ketone **S30** (16 mg, 0.050 mmol) was dissolved in a solution of NH<sub>3</sub> (7.0 N in MeOH, 0.19 mL, 1.3  
 350 mmol) at 0 °C under N<sub>2</sub>. After stirring for 3 h at 0 °C, a solution of hydroxylamine-O-sulfonic acid (6.5  
 351 mg, 0.058 mmol) in MeOH (0.1 mL) was added dropwise. The reaction mixture was allowed to slowly  
 352 warm to room temperature while stirring overnight. The reaction was then concentrated and the  
 353 remaining residue was redissolved in anhydrous DCM (1.0 mL) and pyridine (0.1 mL) under the  
 354 protection of N<sub>2</sub>. PCC (11 mg, 0.05 mmol) was then added in small portions while the reaction mixture  
 355 was cooled to 0 °C. The reaction was then allowed to warm to room temperature and stirred for an  
 356 additional 1 h, then 2 M HCl (1.0 mL) was added into above solution. The resulting solution was  
 357 extracted with DCM (3×10 mL). The combined organic phases were washed with brine, dried over  
 358 Na<sub>2</sub>SO<sub>4</sub> and evaporated. Purification by silica gel column chromatography (EtOAc : hexane = 1:3) gave  
 359 a oil (4.0 mg, 30%). <sup>1</sup>H NMR (400 MHz, CDCl<sub>3</sub>) δ 5.50 – 5.24 (m, 2H), 2.35 (t, *J* = 7.5 Hz, 2H), 2.16  
 360 (td, *J* = 7.0, 2.7 Hz, 2H), 2.02 – 1.91 (m, 3H), 1.79 (p, *J* = 6.6 Hz, 2H), 1.63 (p, *J* = 7.3 Hz, 2H), 1.56 –  
 361 1.34 (m, 2H), 1.34 – 1.17 (m, 16H). <sup>13</sup>C NMR (101 MHz, CDCl<sub>3</sub>) δ 179.7, 131.7, 128.3, 83.4, 68.9,  
 362 34.0, 33.1, 32.6, 32.5, 31.8, 29.7, 29.6, 29.5, 29.5, 29.4, 29.4, 29.2, 29.1, 29.1, 28.3, 26.8, 24.7, 22.7,  
 363 18.0. HRMS-mixed (m/z): calcd. for C<sub>20</sub>H<sub>32</sub>N<sub>2</sub>O<sub>2</sub>H<sup>+</sup> [M+H]<sup>+</sup> : 333.2537, found 333.2535.

364  
 365  
 366

### Synthesis of probe-3

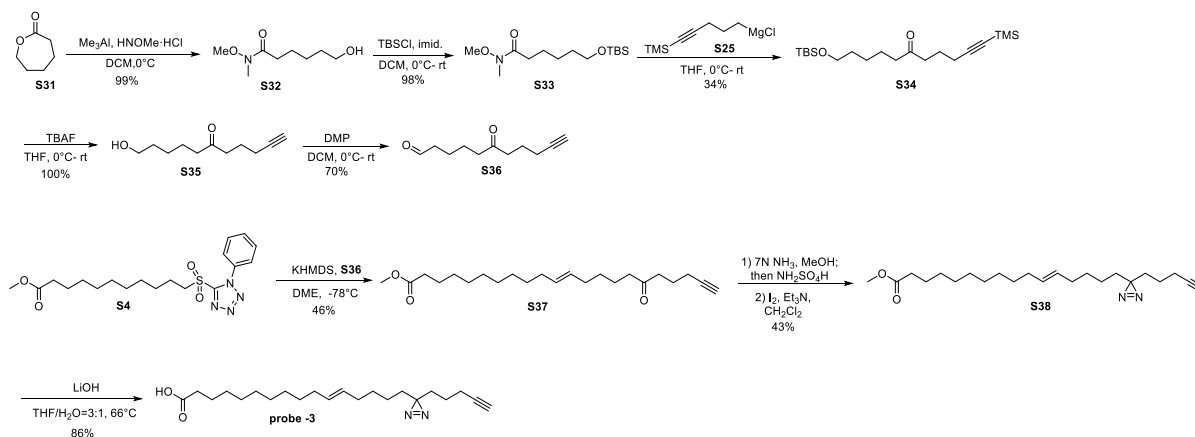

### Scheme 11. Synthesis of probe-3

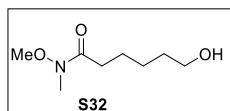

370  
 371 Trimethylaluminium (2.0 M in toluene, 7.5 mL, 35 mmol) was added dropwise to a solution of N,O-  
 372 dimethylhydroxylamine hydrochloride (3.4 g, 35 mmol) and **S31** (2.0 g, 17.5 mmol) in DCM (60 mL)  
 373 at 0 °C. The solution stirred for 24 h at 0 °C. After this time, the solution was carefully quenched at  
 374 0 °C by addition of a solution of potassium sodium L-tartrate tetrahydrate (3.9 g) in H<sub>2</sub>O (5.9 mL). The  
 375 resulting precipitate was filtered through a plug of Celite and washed with DCM. The organic phase  
 376 was dried over Na<sub>2</sub>SO<sub>4</sub>, filtered, and the solvent removed in vacuo to give a light yellow oil (2.9 g,  
 377 99%). Obtained characterization data were in agreement with those published in the literature<sup>3</sup>.

378

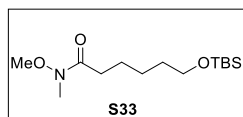

379  
 380 To a solution of **S32** (2.9 g, 16.6 mmol) and imidazole (1.8 g, 26.4 mmol) in DCM (50 mL) was added  
 381 TBSCl (2.8 g, 18.6 mmol) at 0 °C. The mixture was stirred at room temperature for 3 h. The mixture  
 382 was then quenched by addition of H<sub>2</sub>O (15 mL), and extracted with DCM (3 × 30 mL). The combined  
 383 organic layers were washed with brine, dried over Na<sub>2</sub>SO<sub>4</sub>, and concentrated. The residue was purified  
 384 by silica gel chromatography (EtOAc : hexane = 1:3) gave a colorless oil (4.7 g, 98%). Obtained  
 385 characterization data were in agreement with those published in the literature<sup>3</sup>.  
 386

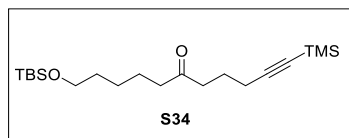

387  
 388 Compound **S33** (1.6 g, 5.7 mmol) was dissolved in anhydrous THF (30 mL) and cooled to 0 °C under  
 389 N<sub>2</sub>. The fresh prepared (5-(Trimethylsilyl)pent-4-yn-1-yl)magnesium chloride **S25** was then added  
 390 dropwise and stirring for an additional 1 h at room temperature. After stirring for 1 h, the reaction was  
 391 quenched with the addition of sat. NH<sub>4</sub>Cl (aq.) (10 mL) and the product was extracted with EtOAc (3  
 392 × 30 mL). The combined organic layers were washed with brine, then dried over Na<sub>2</sub>SO<sub>4</sub> and  
 393 concentrated under reduced pressure. The residue was purified by silica gel chromatography (EtOAc :  
 394 hexane = 1:30) gave a yellow oil (0.7 g, 34%). <sup>1</sup>H NMR (400 MHz, CDCl<sub>3</sub>) δ 3.45 (td, *J* = 6.5, 1.7 Hz,  
 395 2H), 2.39 (td, *J* = 7.3, 1.7 Hz, 2H), 2.28 (td, *J* = 7.5, 1.7 Hz, 2H), 2.11 (td, *J* = 6.9, 1.7 Hz, 2H), 1.63  
 396 (pd, *J* = 7.1, 1.7 Hz, 2H), 1.52 – 1.32 (m, 4H), 1.19 (ttd, *J* = 8.7, 6.3, 3.3 Hz, 2H), 0.74 (d, *J* = 1.7 Hz,  
 397 9H), 0.00 (d, *J* = 1.7 Hz, 9H), -0.10 (d, *J* = 1.6 Hz, 6H). <sup>13</sup>C NMR (101 MHz, CDCl<sub>3</sub>) δ 210.4, 106.2,  
 398 85.2, 62.8, 42.8, 41.0, 32.5, 25.8, 25.4, 23.6, 22.3, 19.1, 18.2, -5.4. HRMS-ESI (m/z): calcd. for  
 399 C<sub>20</sub>H<sub>40</sub>O<sub>2</sub>Si<sub>2</sub>H<sup>+</sup> [M+H]<sup>+</sup> : 369.2640, found 369.2640.  
 400

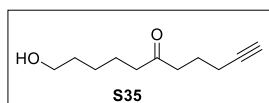

401  
 402 To a solution of **S34** (710 mg, 1.9 mmol) in THF (8.0 mL) was added a solution of TBAF (1.0 M in  
 403 THF, 4.8 mL, 4.8 mmol) at room temperature. The reaction was stirred at room temperature for 30 min  
 404 then quenched with H<sub>2</sub>O (5.0 mL). The mixture was extracted with EtOAc (3×30 mL). The combined  
 405 organic phases were washed with brine, dried over Na<sub>2</sub>SO<sub>4</sub> and concentrated in vacuo. The residue was  
 406 purified by silica gel chromatography (EtOAc : hexane = 1:1) gave a yellow oil (350 mg, 100%). <sup>1</sup>H  
 407 NMR (400 MHz, CDCl<sub>3</sub>) δ 3.64 (td, *J* = 6.5, 4.4 Hz, 2H), 2.56 (td, *J* = 7.2, 3.1 Hz, 2H), 2.45 (td, *J* =  
 408 7.2, 3.2 Hz, 2H), 2.23 (tdd, *J* = 6.8, 4.2, 2.5 Hz, 2H), 1.97 (q, *J* = 2.6 Hz, 1H), 1.86 – 1.71 (m, 2H), 1.68  
 409 – 1.51 (m, 4H), 1.44 – 1.30 (m, 2H). <sup>13</sup>C NMR (101 MHz, CDCl<sub>3</sub>) δ 210.6, 83.6, 69.1, 62.6, 42.8, 41.1,  
 410 32.4, 25.4, 23.5, 22.2, 17.8. HRMS-ESI (m/z): calcd. for C<sub>11</sub>H<sub>18</sub>O<sub>2</sub>Na<sup>+</sup> [M+Na]<sup>+</sup> : 205.1199, found  
 411 205.1202  
 412

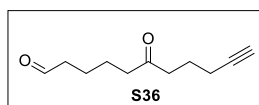

413  
 414 Dess-Martin reagent (413 mg, 0.97 mmol) was added to the solution of **S35** (100 mg, 0.65 mmol) in  
 415 DCM (6.5 mL) at 0°C, and the mixture was stirred at room temperature for 4 hours. The reaction

416 mixture was quenched with saturated  $\text{Na}_2\text{S}_2\text{O}_3$  :  $\text{NaHCO}_3$  = 1:1 (10 mL), and the product was extracted  
417 with DCM (3×20 mL). The organic layer was washed with brine and dried over  $\text{Na}_2\text{SO}_4$ ,  
418 concentrated in vacuo. The residue was purified by silica gel chromatography (EtOAc : hexane = 1:3)  
419 gave a yellow oil (70 mg, 70%).  $^1\text{H}$  NMR (400 MHz,  $\text{CDCl}_3$ )  $\delta$  9.77 (s, 1H), 2.56 (t, 2H), 2.48 – 2.41  
420 (m, 4H), 2.23 (tdd,  $J$  = 6.9, 2.7, 1.2 Hz, 2H), 1.97 (dq,  $J$  = 2.7, 1.3 Hz, 1H), 1.79 (d, 2H), 1.70 – 1.55  
421 (m, 4H).  $^{13}\text{C}$  NMR (101 MHz,  $\text{CDCl}_3$ )  $\delta$  209.8, 202.2, 83.5, 77.4, 77.1, 76.8, 69.1, 43.7, 42.5, 41.1,  
422 23.2, 22.2, 21.6, 17.7. HRMS-ESI (m/z): calcd. for  $\text{C}_{11}\text{H}_{16}\text{O}_2\text{H}^+$   $[\text{M}+\text{H}]^+$  : 181.1213, found 181.1218  
423

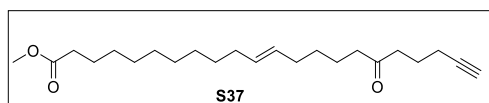

424  
425 To a stirred solution of the **S4** (174 mg, 0.43 mmol) in DME (2.0 mL) at  $-78^\circ\text{C}$  under nitrogen was  
426 added dropwise the KHMDS (0.5 M in toluene, 0.85 mL, 0.43 mmol) The mixture was then stirred for  
427 30 min before addition of the aldehyde **S36** (70 mg, 0.39 mmol). After stirring for a further 1 h at -  
428  $78^\circ\text{C}$  the reaction mixture was quenched with sat.  $\text{NH}_4\text{Cl}$  (3.0 mL), then the mixture was extracted with  
429 EtOAc (3×10 mL). The combined organic phases were washed with brine, dried over  $\text{Na}_2\text{SO}_4$  and  
430 evaporated. Purification by silica gel column chromatography (EtOAc: hexane = 1:10) gave a yellow  
431 oil (65 mg, 46%).  $^1\text{H}$  NMR (400 MHz,  $\text{CDCl}_3$ )  $\delta$  5.46 – 5.30 (m, 2H), 3.66 (s, 3H), 2.55 (t,  $J$  = 7.2 Hz,  
432 2H), 2.41 (t,  $J$  = 7.4 Hz, 2H), 2.30 (t,  $J$  = 7.5 Hz, 2H), 2.23 (td,  $J$  = 6.9, 2.6 Hz, 2H), 2.08 – 1.91 (m,  
433 5H), 1.79 (d,  $J$  = 6.4 Hz, 2H), 1.69 – 1.52 (m, 4H), 1.40 – 1.24 (m, 15H).  $^{13}\text{C}$  NMR (101 MHz,  $\text{CDCl}_3$ )  
434  $\delta$  210.5, 174.3, 130.9, 129.6, 83.6, 69.0, 51.4, 42.8, 41.0, 34.1, 32.6, 32.3, 29.6, 29.4, 29.4, 29.3, 29.2,  
435 29.2, 25.0, 23.4, 22.3, 17.8. HRMS-ESI (m/z): calcd. for  $\text{C}_{23}\text{H}_{38}\text{O}_3\text{H}^+$   $[\text{M}+\text{H}]^+$  : 363.2894, found  
436 363.2890  
437

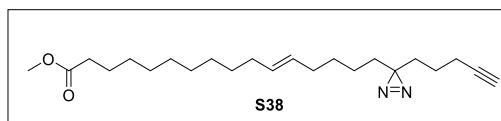

438  
439 To a solution of **S37** (65 mg, 0.18 mmol) in MeOH (0.10 mL) was added an ammonia solution in  
440 MeOH (7 N, 2.0 mL) at  $0^\circ\text{C}$  under Ar. The solution was stirred at that temperature for 1 h then warmed  
441 to room temperature stirred for 2 h. Cooled to  $0^\circ\text{C}$  again, to this solution was then added  
442 hydroxylamine-O-sulfonic acid (24.3 mg, 0.22 mmol) slowly at  $0^\circ\text{C}$ . The resulting mixture was  
443 warmed to rt and stirred for 16 h. The white precipitate was removed by filtration and the remaining  
444 solution was concentrated by vacuo. The residue was re-dissolved in DCM (1.0 mL). To this solution  
445 was added  $\text{Et}_3\text{N}$  (0.043 mL, 0.3 mmol) and a solution of  $\text{I}_2$  (82 mg, 0.32 mmol) in DCM (1.0 mL)  
446 dropwise until the solution stayed red-brown. The reaction mixture was quenched by saturated  $\text{Na}_2\text{S}_2\text{O}_3$ ,  
447 and extracted with DCM (3×10 mL). The combined organic phases were washed with brine, dried over  
448  $\text{Na}_2\text{SO}_4$  and evaporated. Purification by silica gel column chromatography (EtOAc: hexane = 1:30)  
449 gave a yellow oil (29 mg, 43%).  $^1\text{H}$  NMR (400 MHz,  $\text{CDCl}_3$ )  $\delta$  5.46 – 5.27 (m, 2H), 3.66 (s, 3H), 2.30  
450 (t,  $J$  = 7.7 Hz, 3H), 2.16 (tdd,  $J$  = 6.8, 2.6, 1.0 Hz, 2H), 2.02 – 1.89 (m, 5H), 1.67 – 1.56 (m, 2H), 1.56  
451 – 1.44 (m, 2H), 1.41 – 1.20 (m, 18H), 1.15 – 1.03 (m, 1H).  $^{13}\text{C}$  NMR (101 MHz,  $\text{CDCl}_3$ )  $\delta$  174.3, 130.9,  
452 129.6, 83.4, 68.9, 51.4, 34.1, 32.7, 32.6, 32.3, 31.8, 29.6, 29.4, 29.3, 29.2, 29.1, 29.1, 28.4, 25.0, 23.3,  
453 22.8, 18.0. HRMS-mixed (m/z): calcd. for  $\text{C}_{23}\text{H}_{38}\text{N}_2\text{O}_2\text{H}^+$   $[\text{M}+\text{H}]^+$  : 375.3006, found 375.3018.  
454  
455



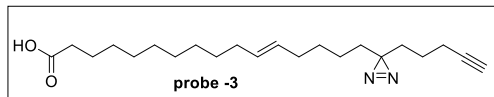

456  
 457 The above product **S38** (also named as control probe N-1 for Fig. 4e., 28 mg, 0.076mmol) was dissolved  
 458 in THF:H<sub>2</sub>O=3:1 (2.4 mL), then LiOH (13 mg, 0.30 mmol) was added into the above solution, heated  
 459 the mixture to 66°C and stirred for 3 h, cooled to room temperature, 2M HCl was added to the mixture  
 460 to adjust the pH to 2, then the mixture was extracted with EtOAc (3×10 mL). The combined organic  
 461 phases were washed with brine, dried over Na<sub>2</sub>SO<sub>4</sub> and evaporated. Purification by silica gel column  
 462 chromatography (EtOAc : hexane = 1:6) gave a colorless oil (24 mg, 96%). <sup>1</sup>H NMR (400 MHz, CDCl<sub>3</sub>)  
 463 δ 5.47 – 5.23 (m, 2H), 2.35 (t, *J* = 7.5 Hz, 3H), 2.20 – 2.06 (m, 2H), 1.98 – 1.87 (m, 5H), 1.69 – 1.57  
 464 (m, 2H), 1.57 – 1.43 (m, 2H), 1.41 – 1.23 (m, 18H), 1.15 – 1.05 (m, 1H). <sup>13</sup>C NMR (101 MHz, CDCl<sub>3</sub>)  
 465 δ 180.1, 130.9, 129.6, 83.5, 68.9, 34.1, 32.7, 32.6, 32.3, 31.8, 29.6, 29.4, 29.4, 29.2, 29.1, 29.1,  
 466 28.4, 24.7, 23.3, 22.8, 18.0. HRMS-ESI (m/z): calcd. for C<sub>22</sub>H<sub>36</sub>N<sub>2</sub>O<sub>2</sub>H<sup>+</sup> [M+H]<sup>+</sup> : 361.2850, found  
 467 361.2847

468  
 469  
 470  
 471  
 472  
 473  
 474  
 475  
 476  
 477  
 478

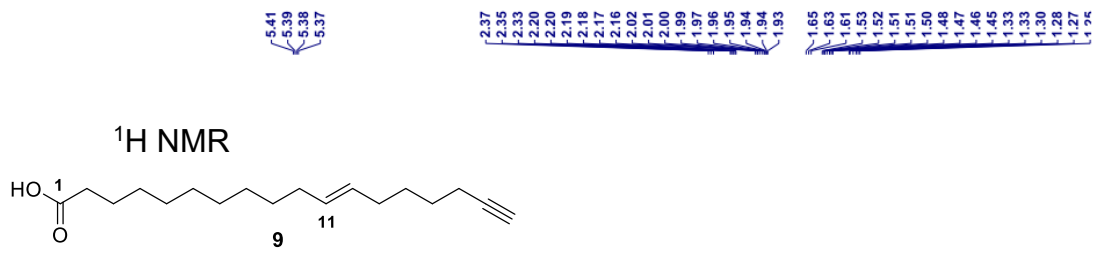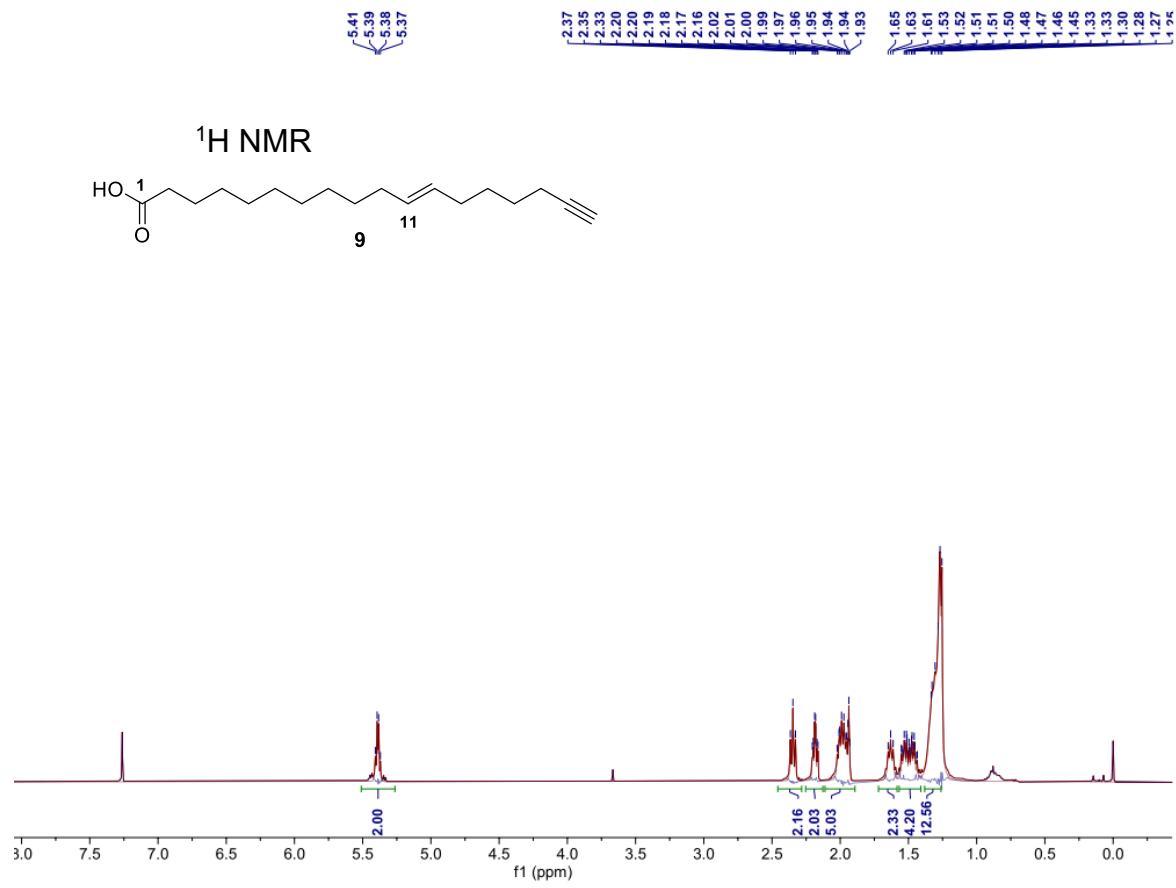

479

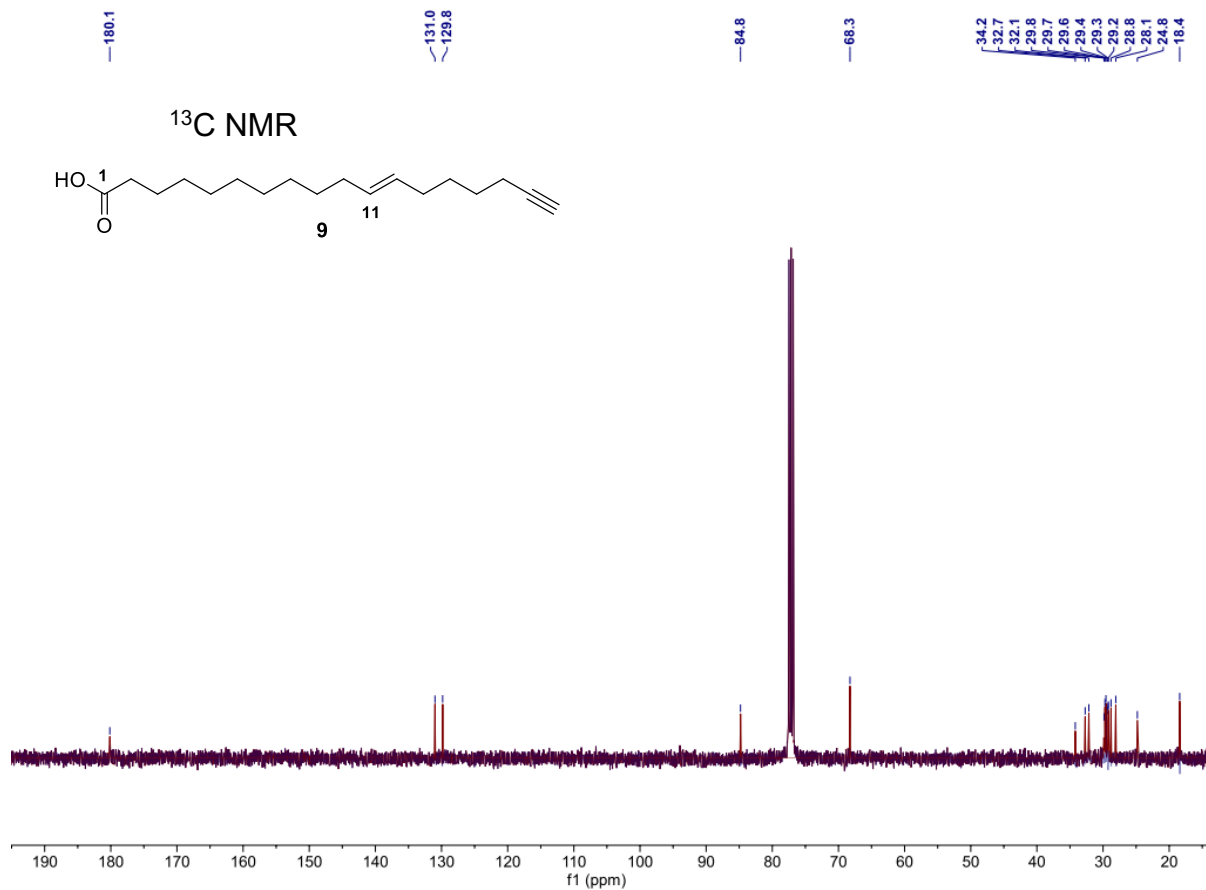

480  
481

7.24  
7.22  
7.10  
7.08  
6.38  
6.32  
6.20  
6.18  
6.17  
6.16  
6.14  
6.13  
6.10

2.36  
2.35  
2.33  
2.32  
2.23  
2.21  
2.21  
2.19  
2.17  
2.16  
2.16  
1.67  
1.65  
1.63  
1.61  
1.60  
1.49  
1.47  
1.45  
1.43  
1.41  
1.34  
1.33  
1.30

### <sup>1</sup>H NMR

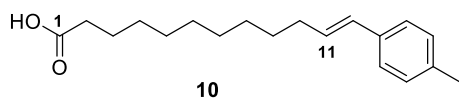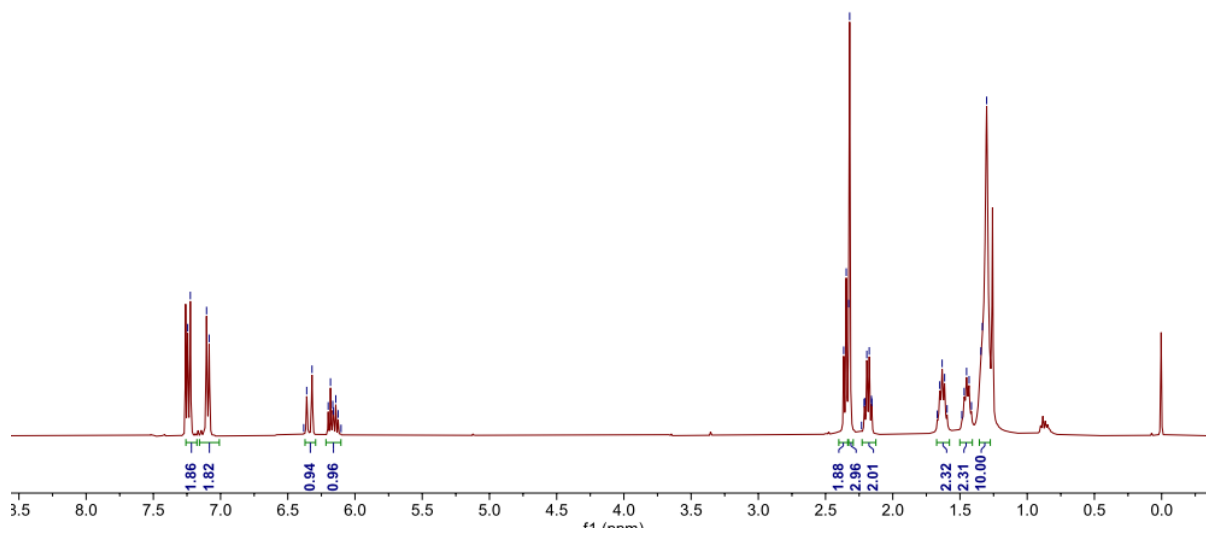

482

### <sup>13</sup>C NMR

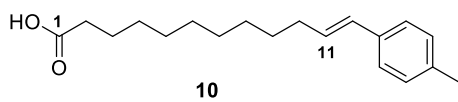

483

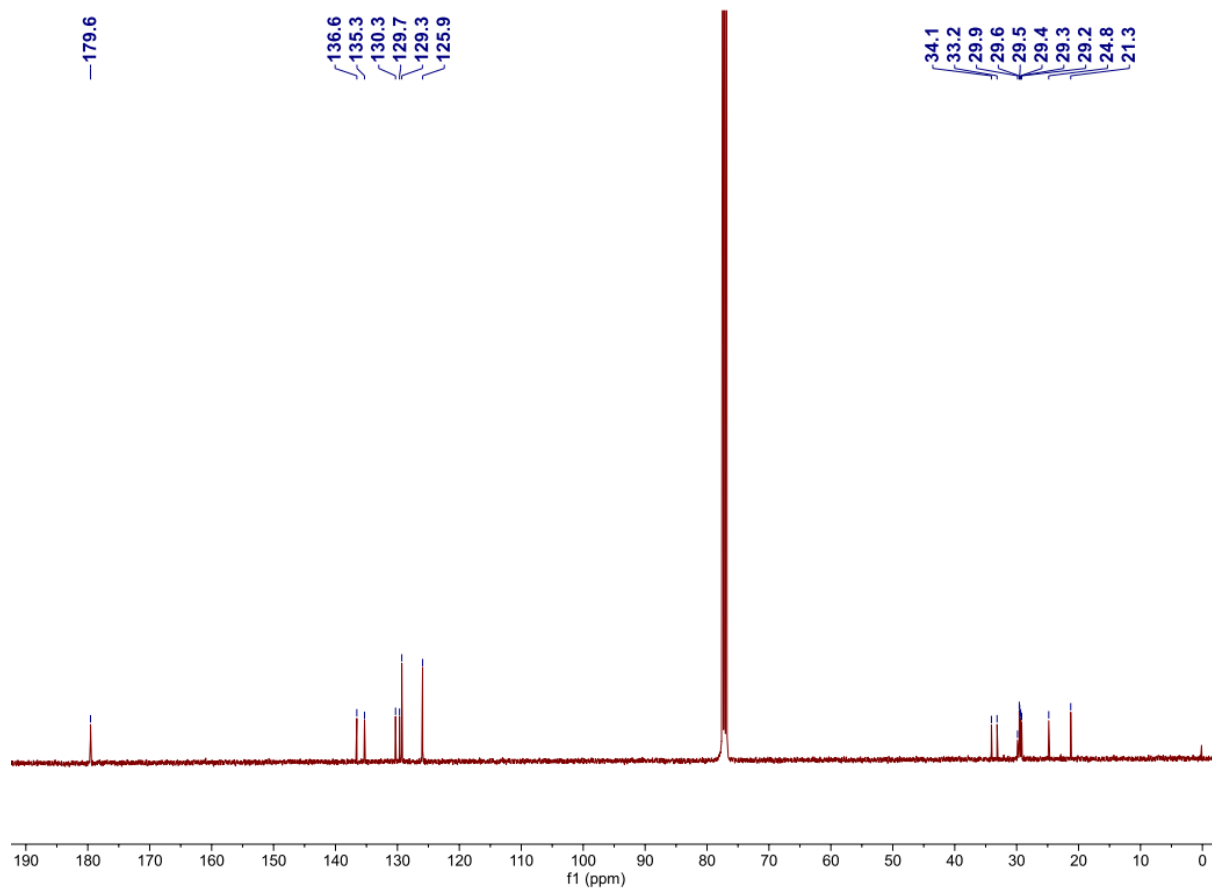

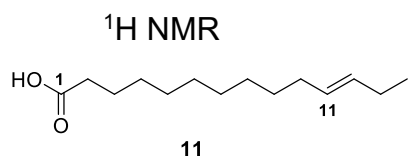

5.47  
5.46  
5.45  
5.43  
5.42  
5.41  
5.40  
5.38  
5.37  
5.36  
5.34  
5.33  
5.31

2.36  
2.35  
2.33  
2.07  
2.05  
2.05  
2.03  
2.02  
2.01  
1.99  
1.97  
1.94  
1.94  
1.67  
1.65  
1.63  
1.61  
1.59  
1.35  
1.33  
1.30  
1.27  
0.98  
0.96  
0.94

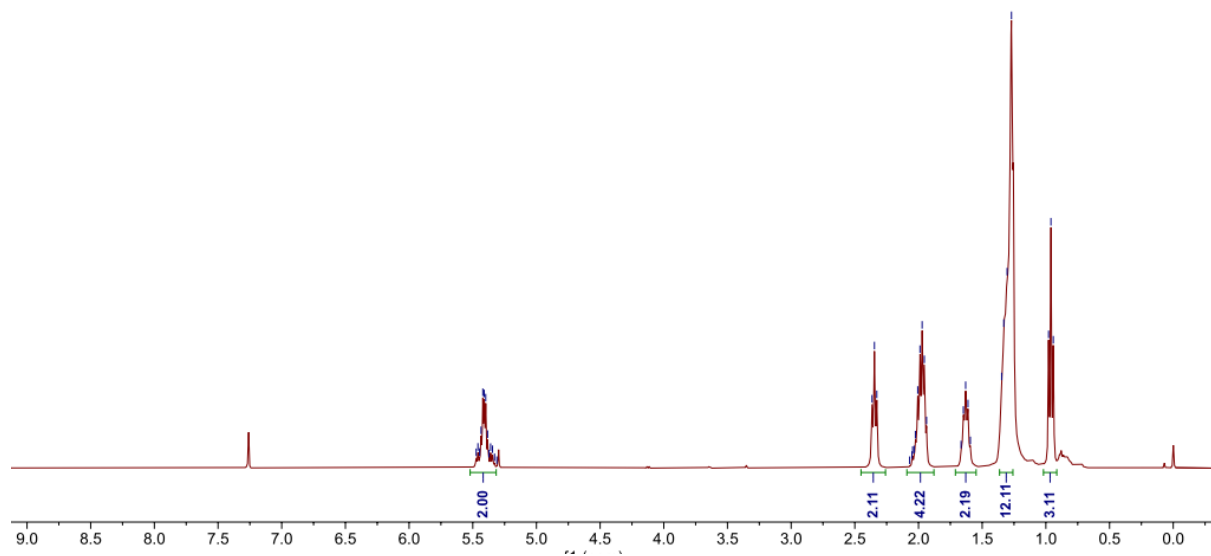

484

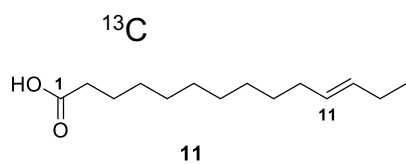

485  
486

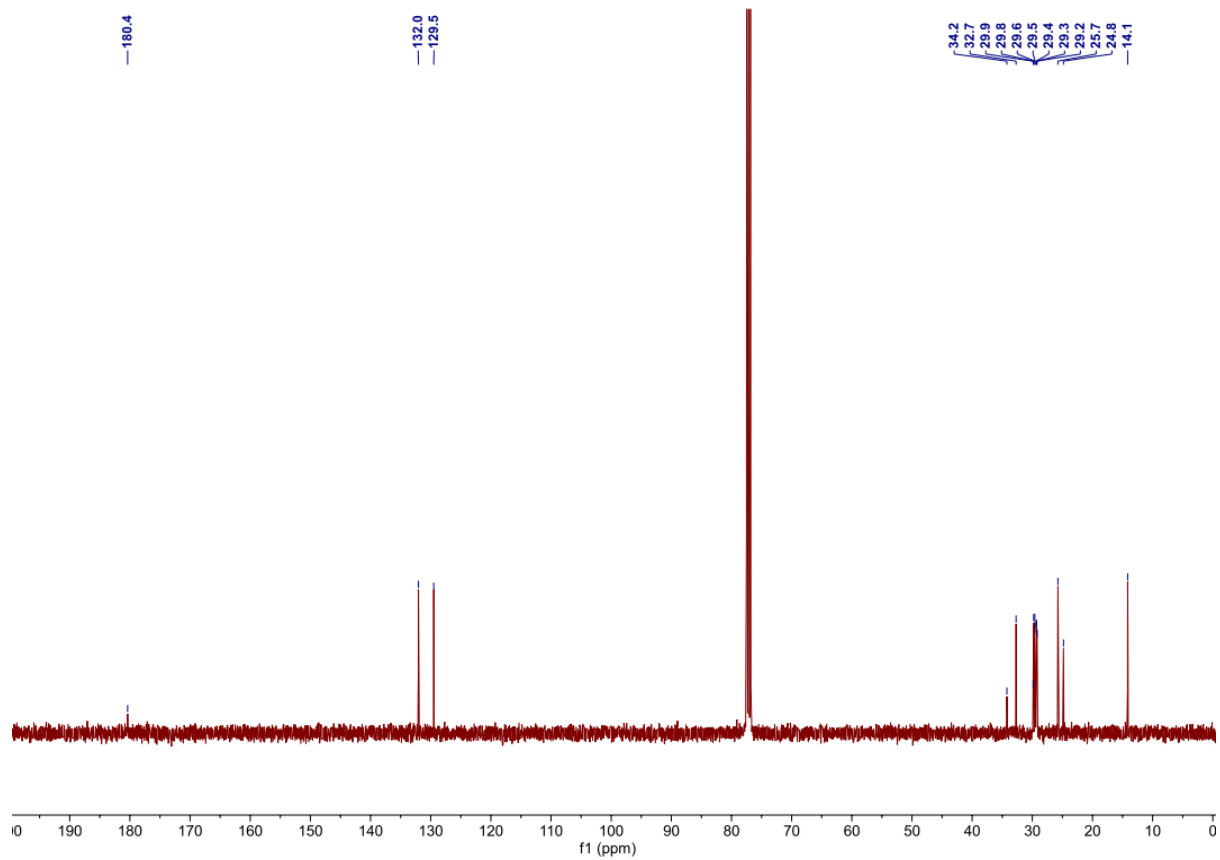

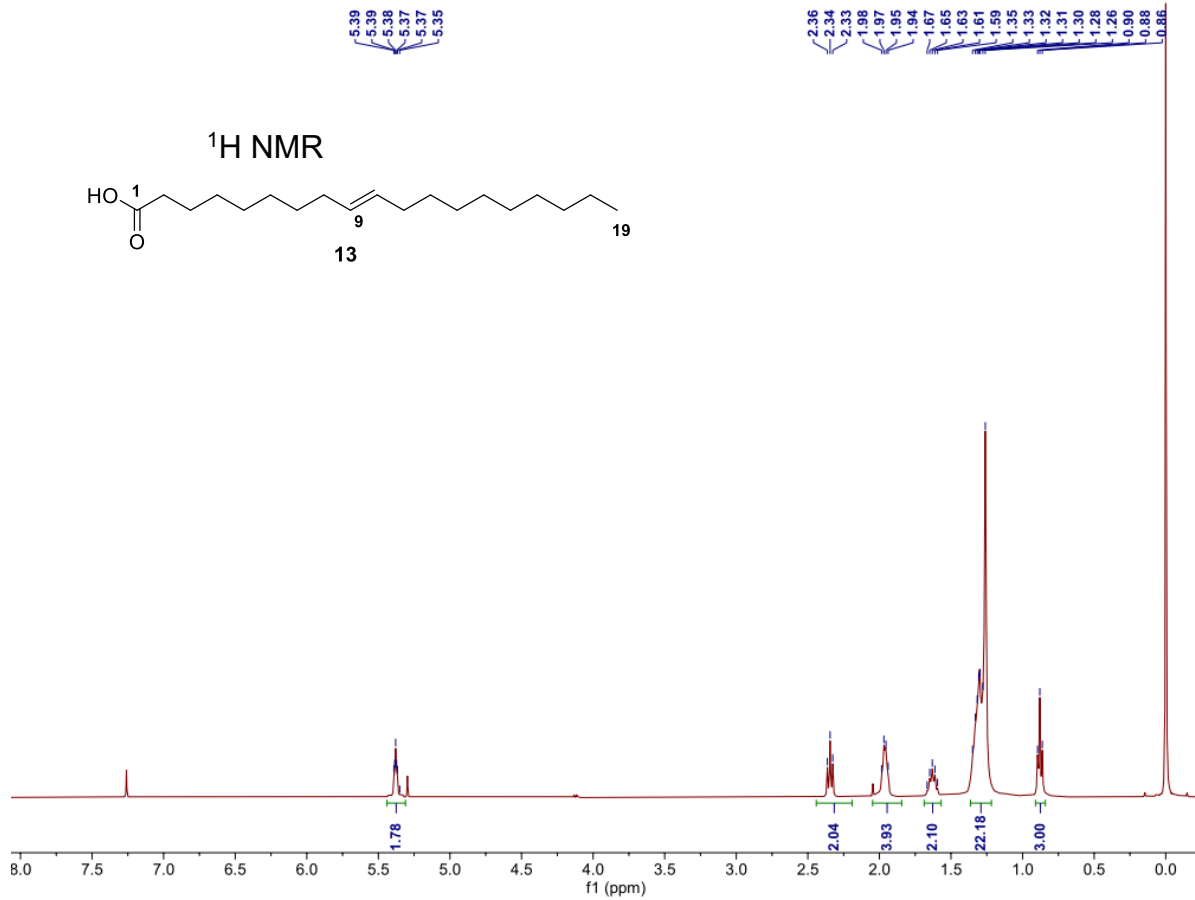

487

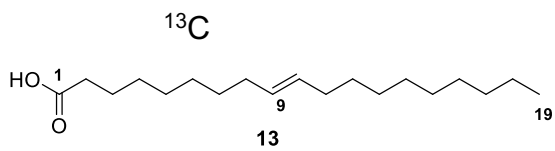



488

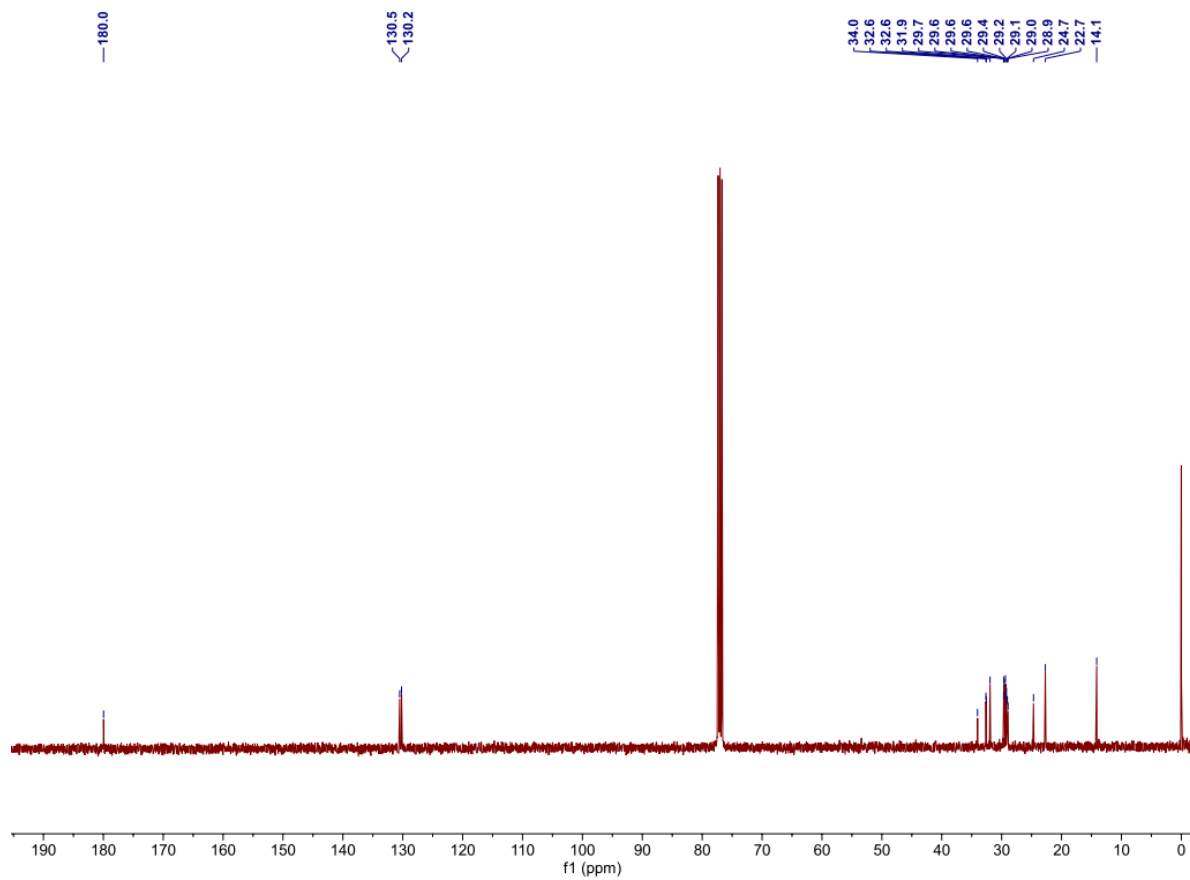

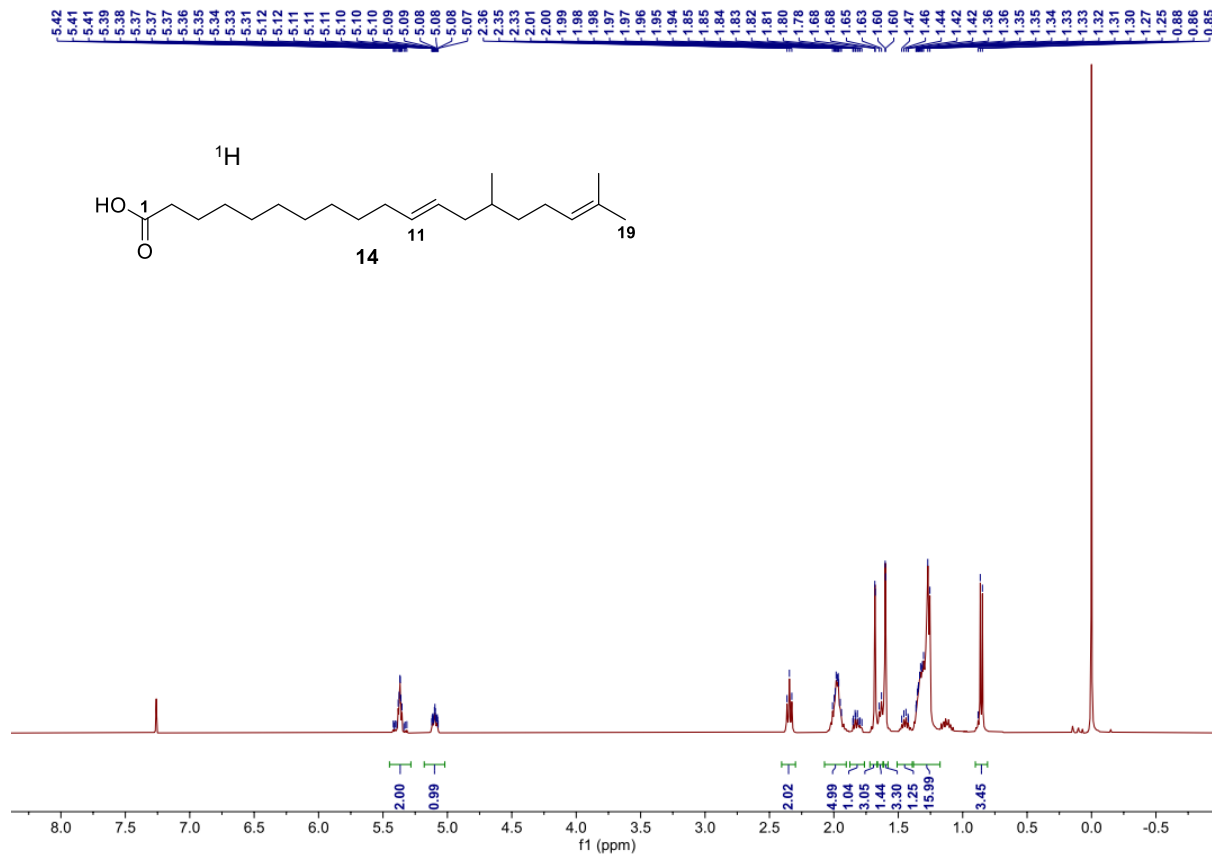

489

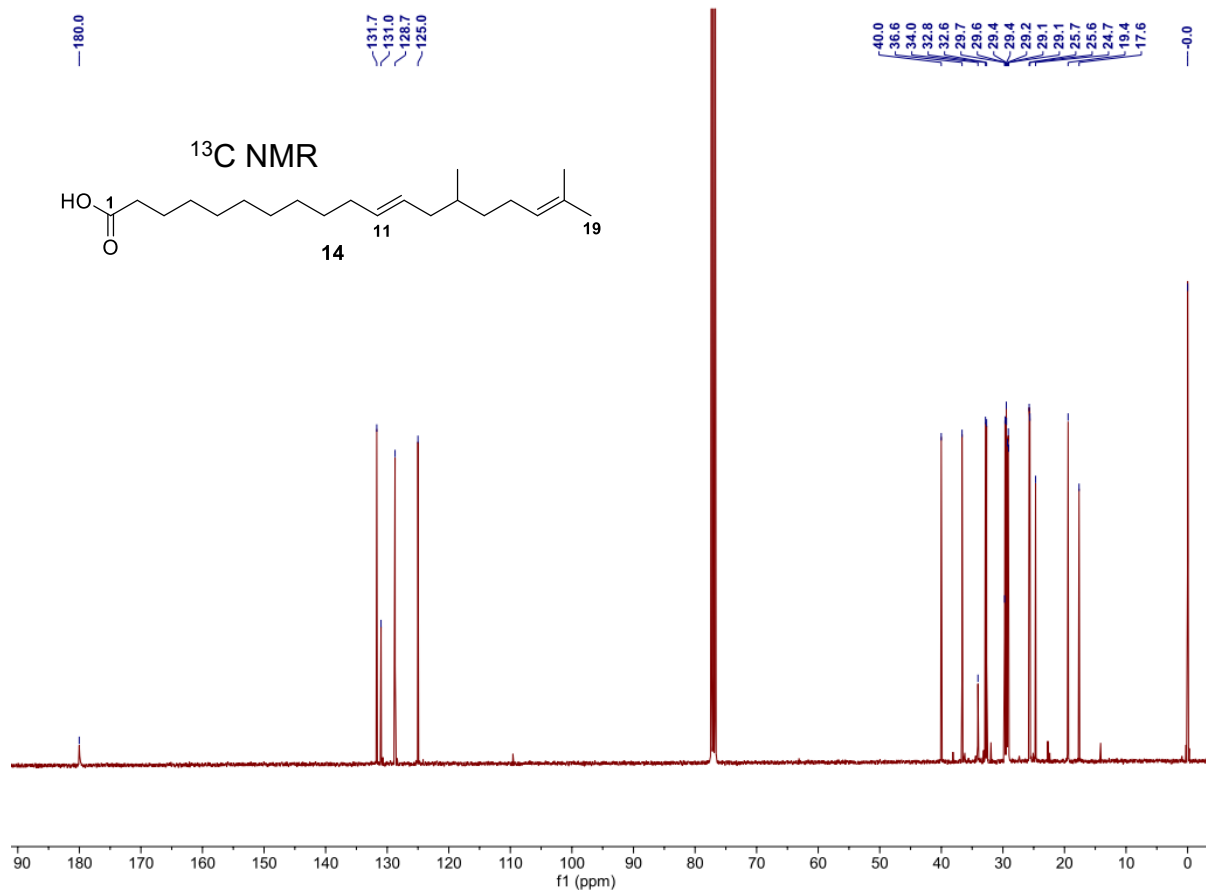

490

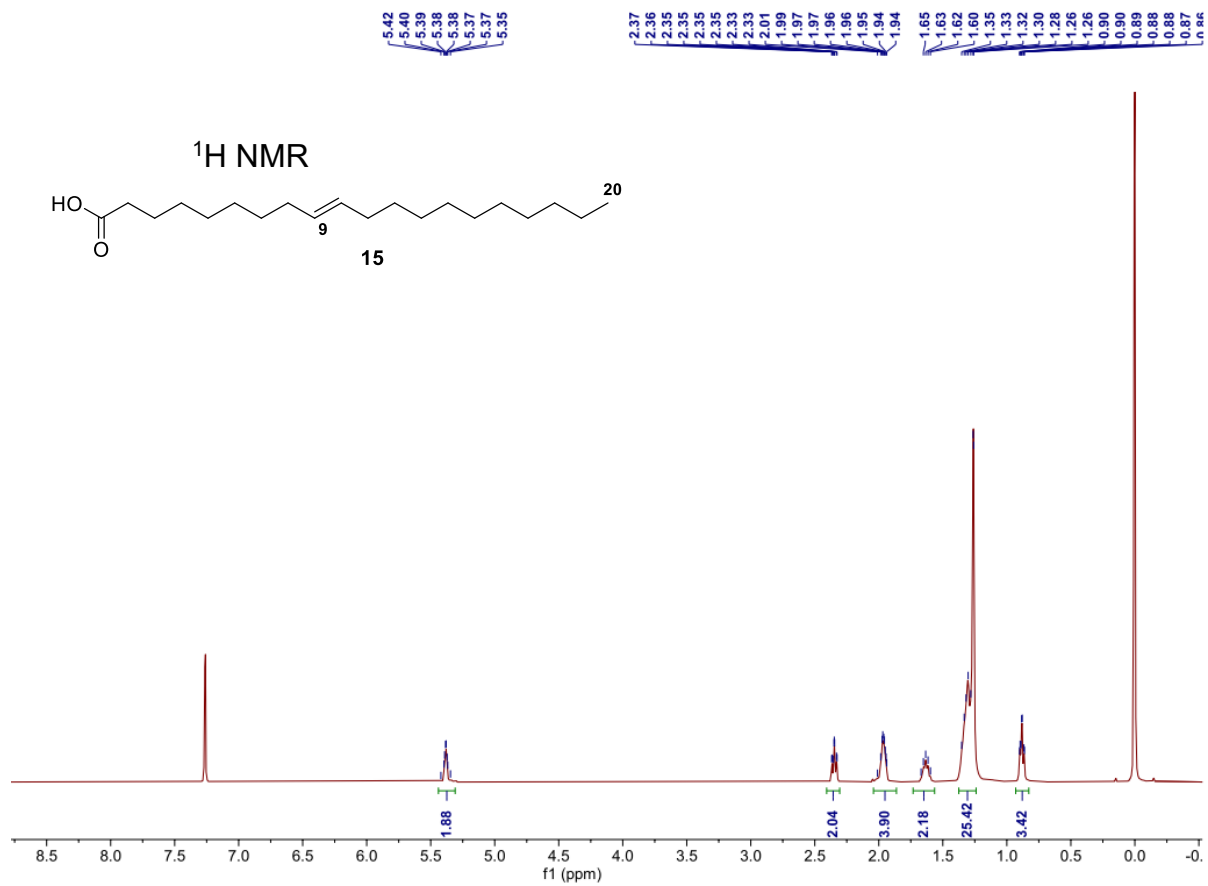

491

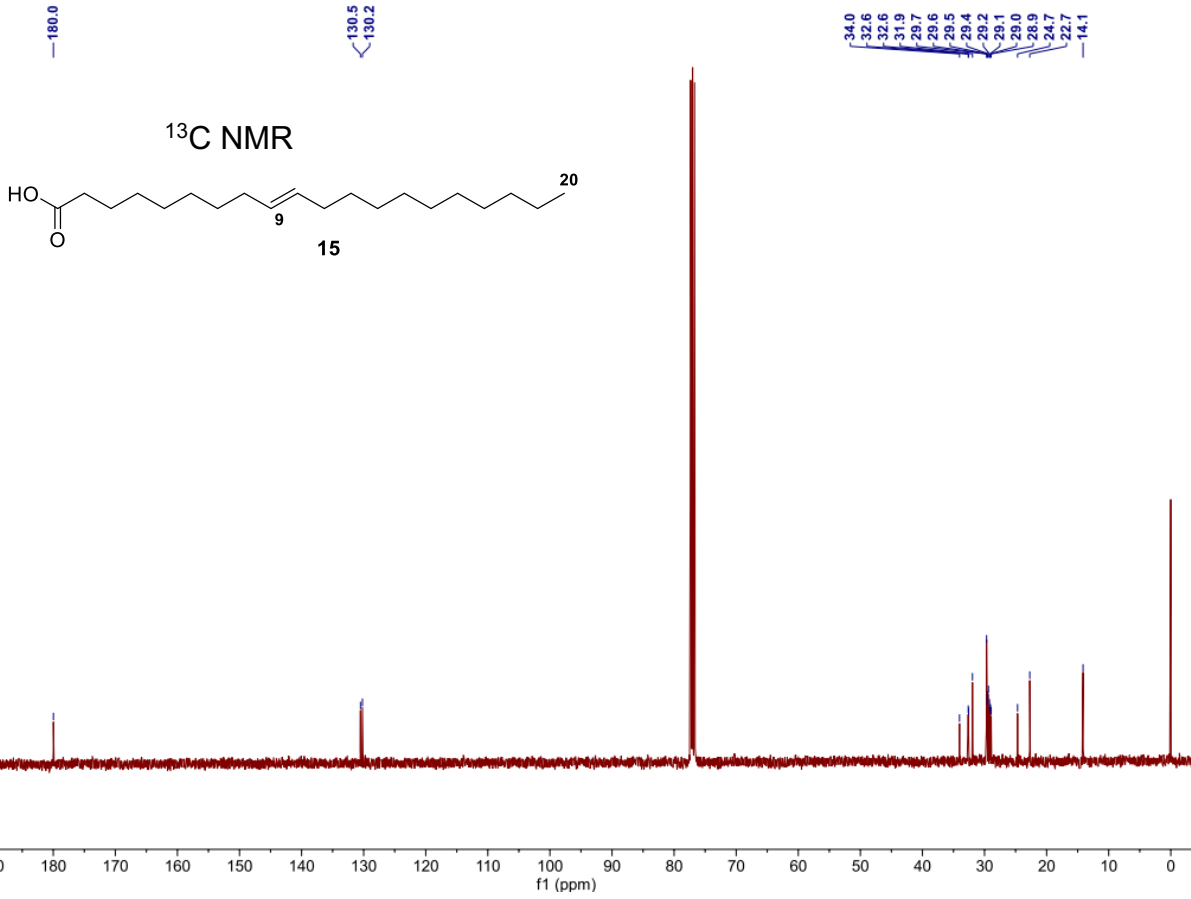

492

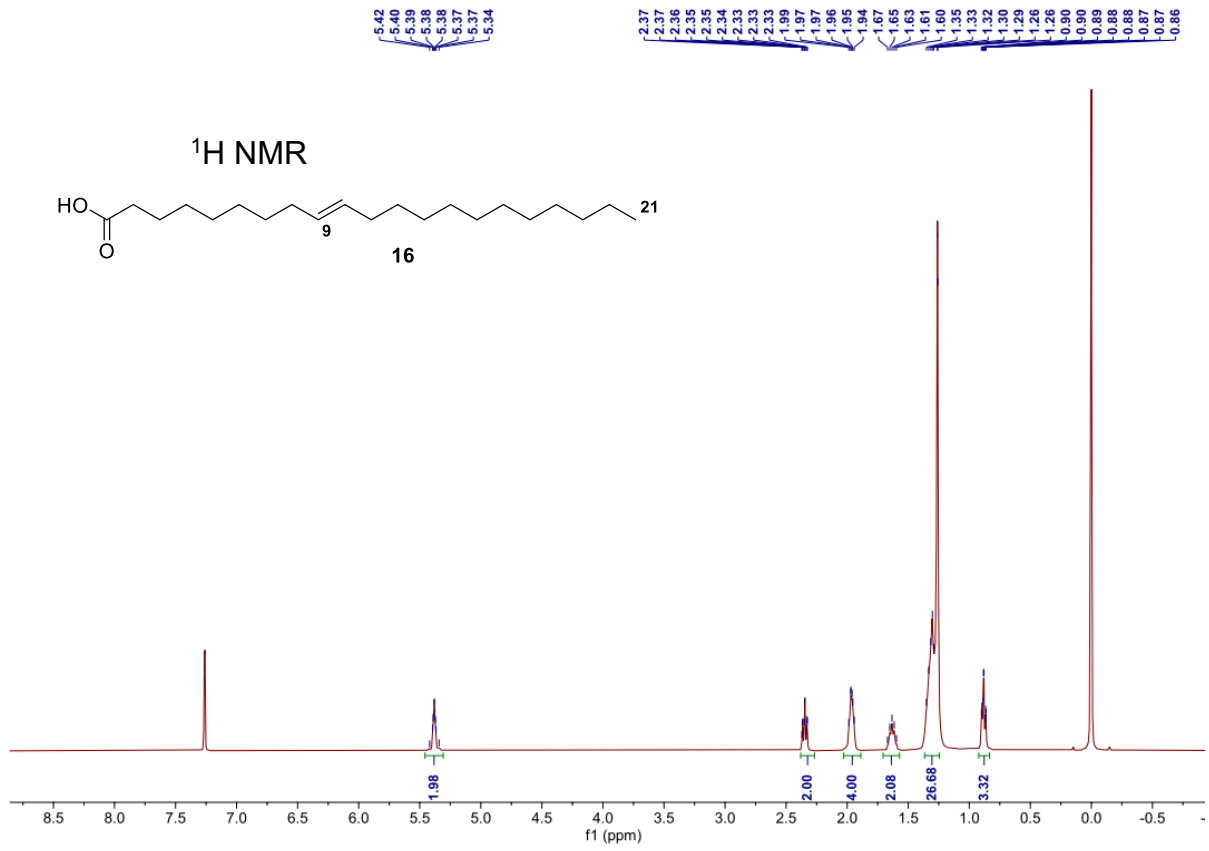

493

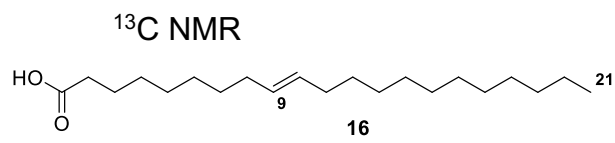

494

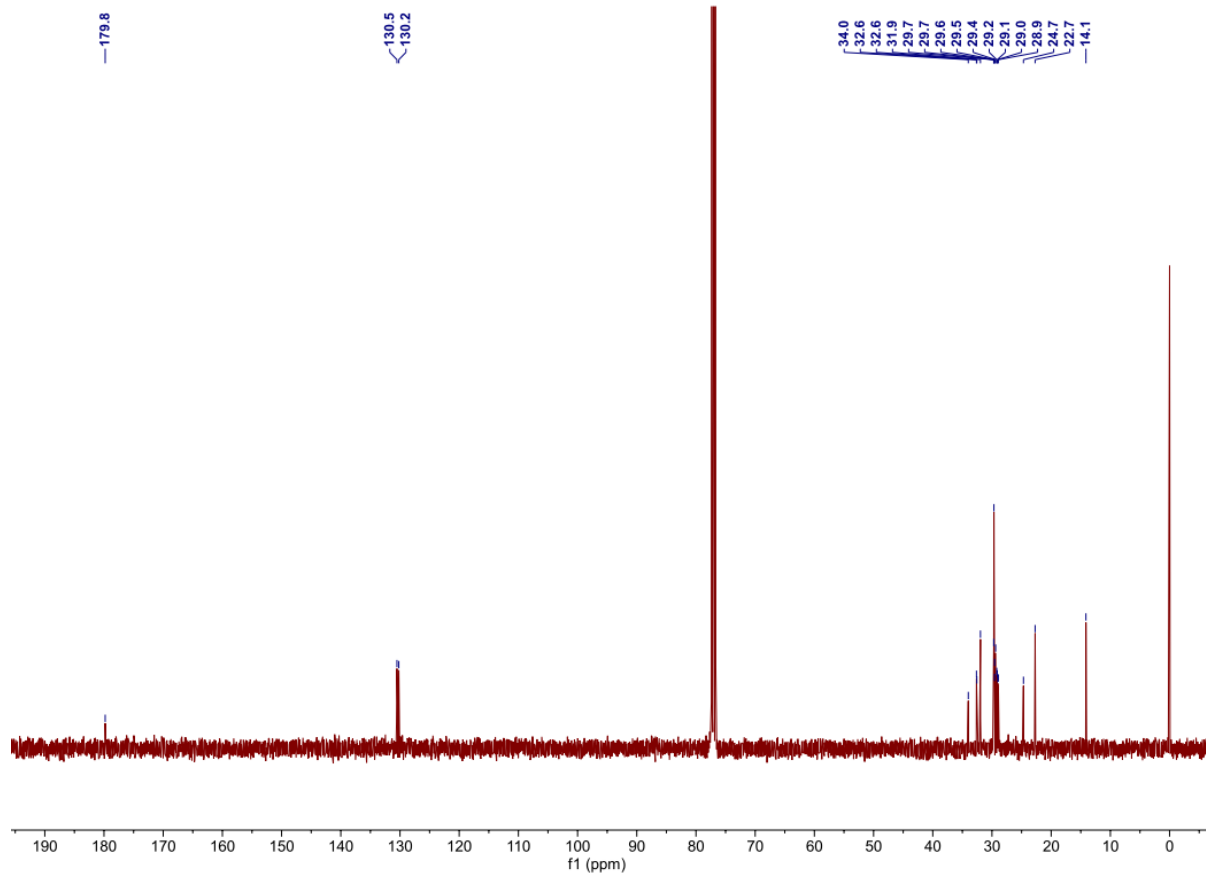

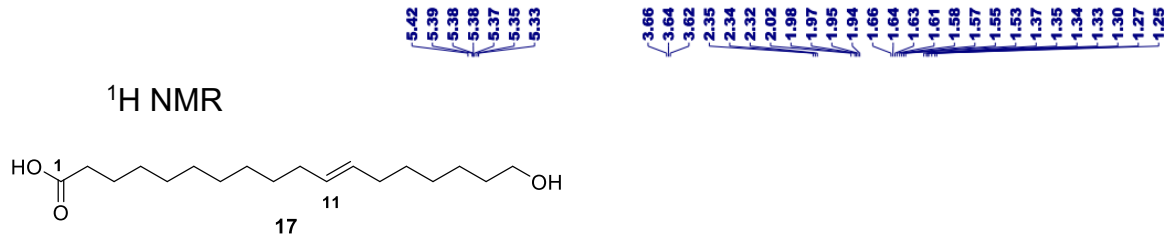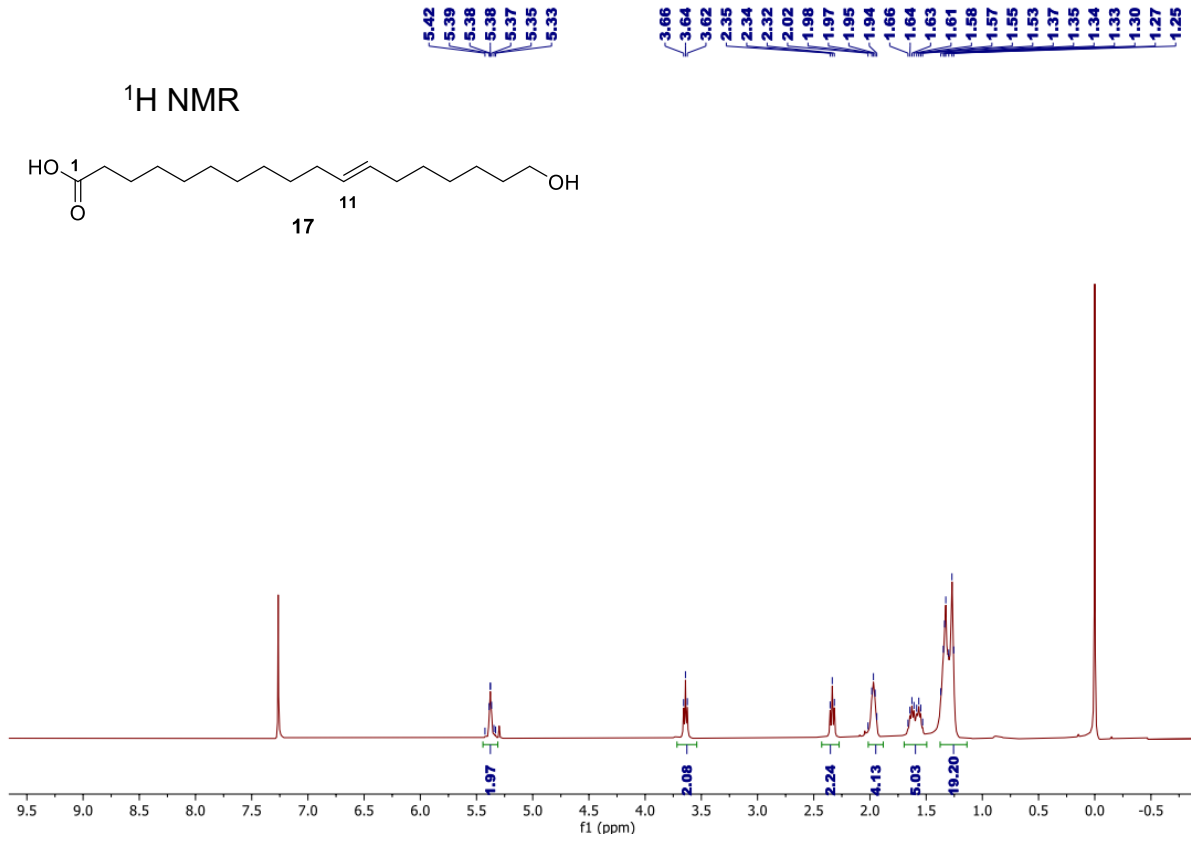

495

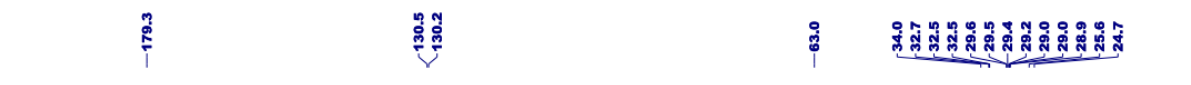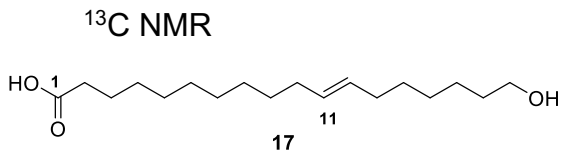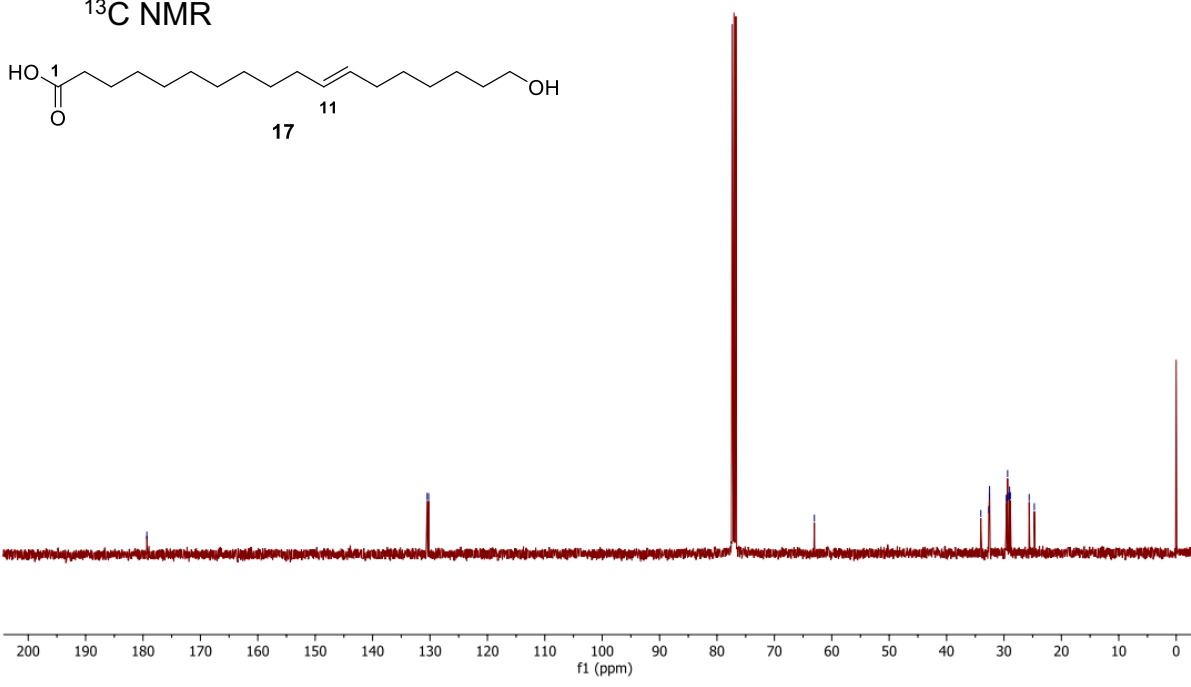

496



497  
498

5.56  
5.54  
5.52  
5.51  
5.49  
5.48  
5.47  
5.45  
5.22  
5.21  
5.20  
5.19  
5.18  
5.17  
5.15  
5.15  
2.37  
2.35  
2.33  
2.31  
2.30  
2.29  
2.28  
2.27  
2.07  
2.05  
2.05  
2.05  
2.03  
2.03  
2.02  
2.01  
2.01  
2.00  
1.99  
1.98  
1.98  
1.97  
1.96  
1.95  
1.94  
1.92  
1.90  
1.67  
1.66  
1.65  
1.65  
1.64  
1.64  
1.63  
1.62  
1.59  
1.35  
1.34  
1.33  
1.30  
1.27

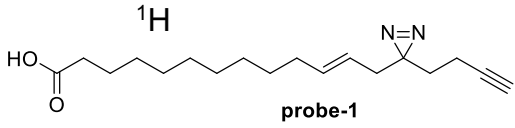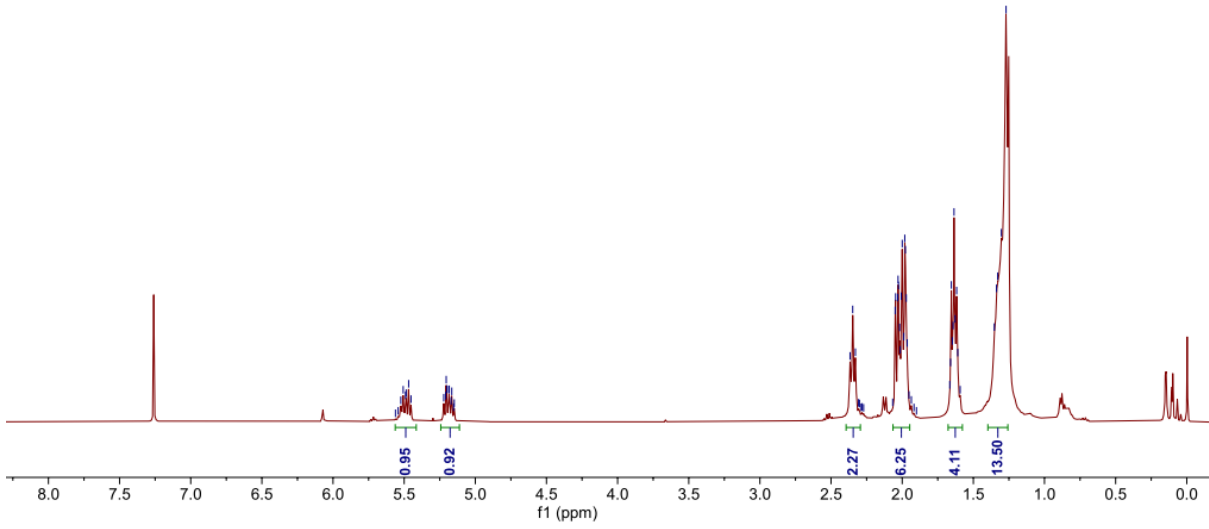

499

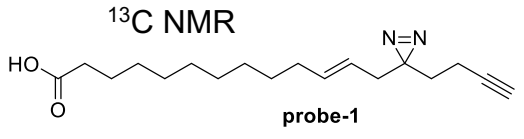

500

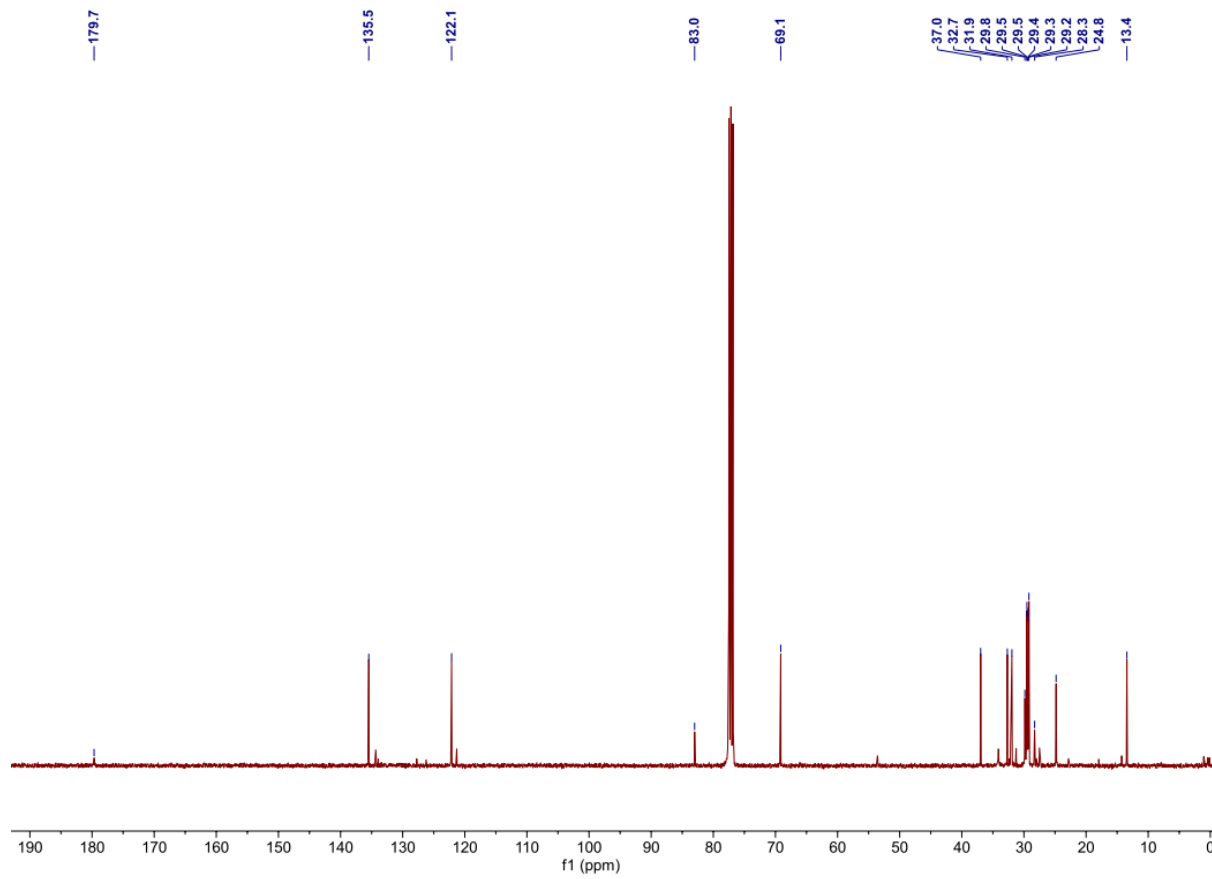

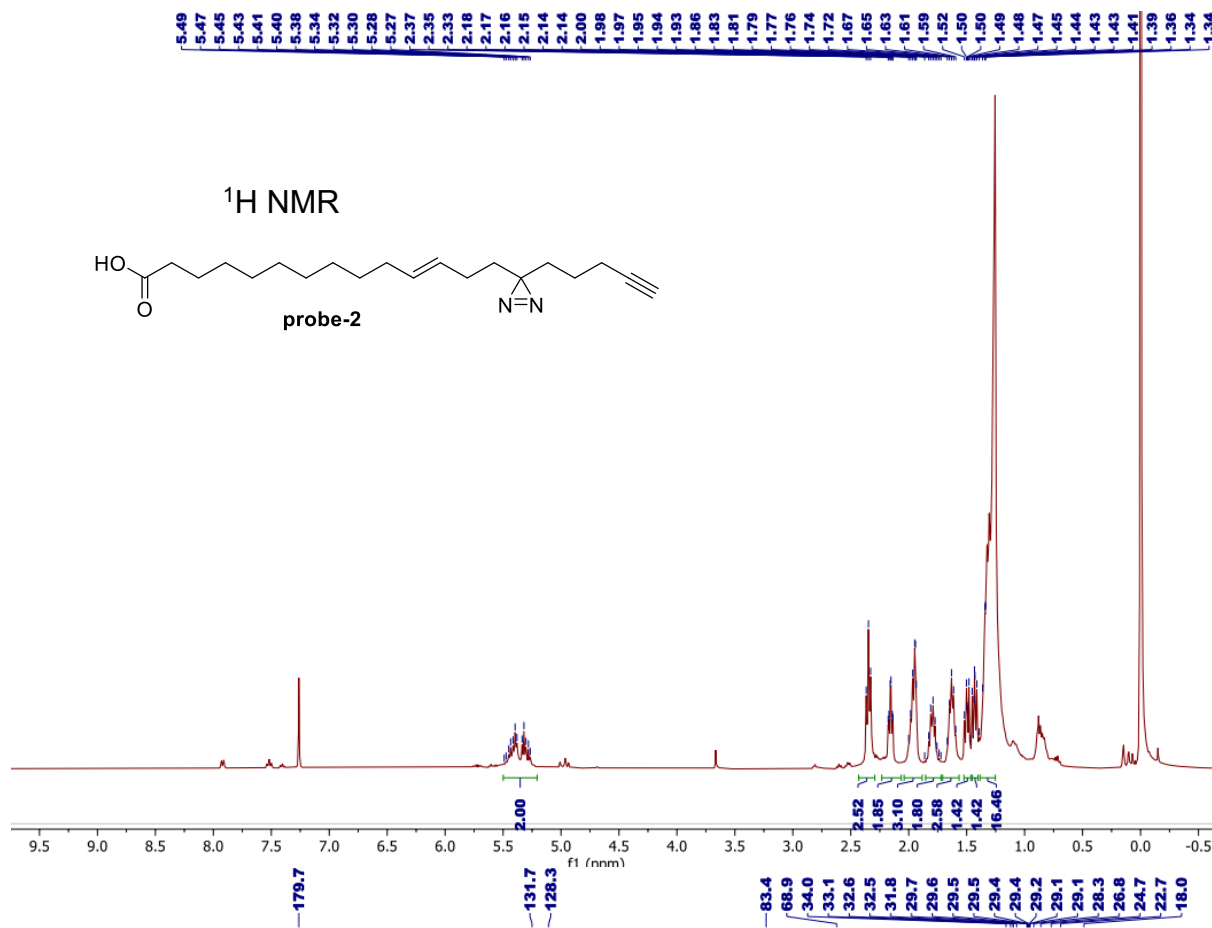

501

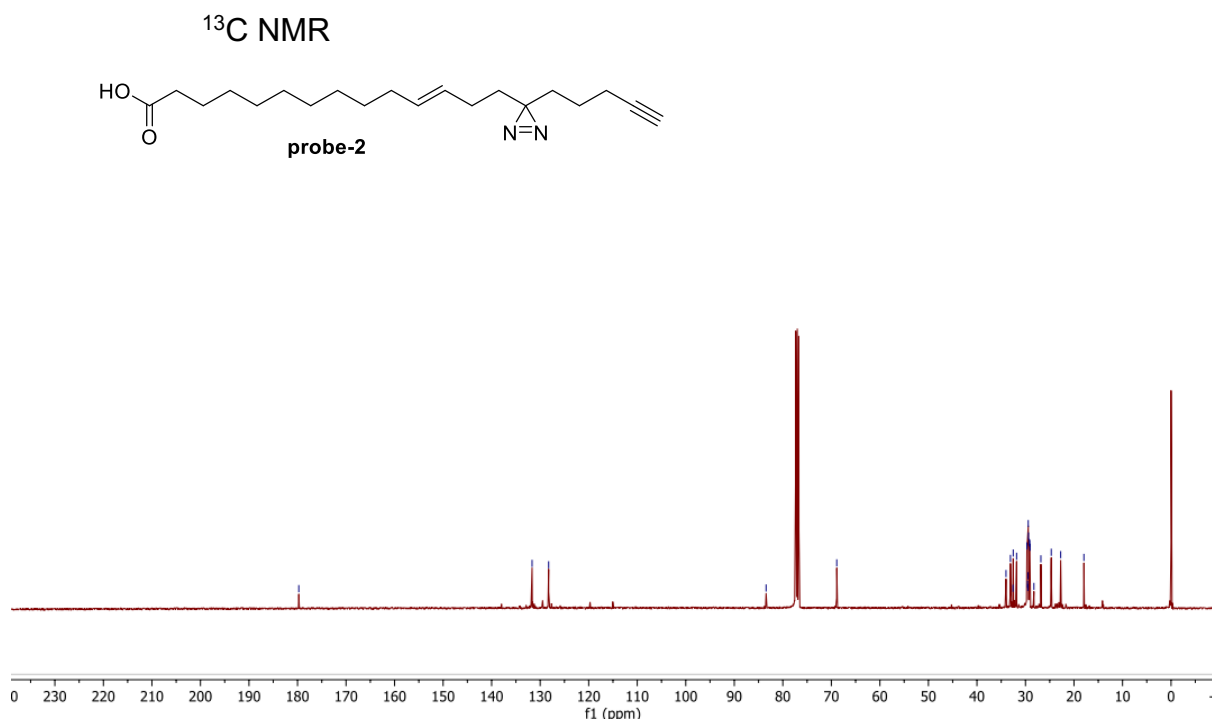

502

5.42 5.41 5.39 5.38 5.36 5.36 5.35 5.35 5.33 5.33 2.37 2.35 2.33 2.18 2.18 2.17 2.16 2.15 2.14 2.14 2.12 2.10 2.09 2.07 1.96 1.96 1.95 1.94 1.94 1.94 1.93 1.91 1.87 1.65 1.63 1.61 1.60 1.54 1.52 1.51 1.49 1.49 1.48 1.48 1.47 1.44 1.44 1.38 1.38 1.37 1.37 1.36 1.36 1.35 1.33 1.33 1.31 1.29 1.27 1.26 1.13 1.12 1.11 1.10 1.09 1.08 1.07 1.07 1.05

<sup>1</sup>H NMR

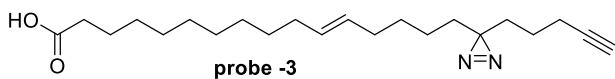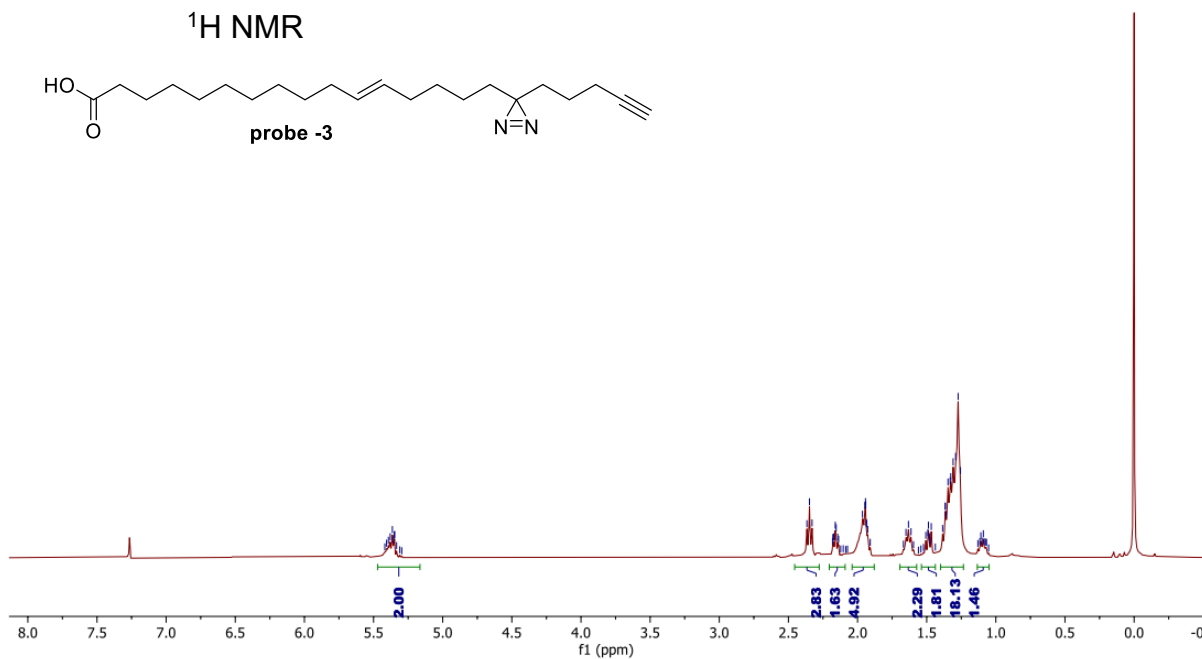

503

180.1 130.9 129.6 83.5 68.9 34.1 32.7 32.6 32.3 31.8 29.6 29.4 29.4 29.2 29.1 29.1 29.1 28.4 24.7 23.3 22.8 18.0

<sup>13</sup>C NMR

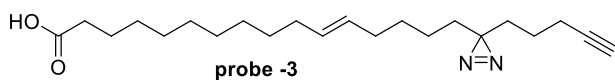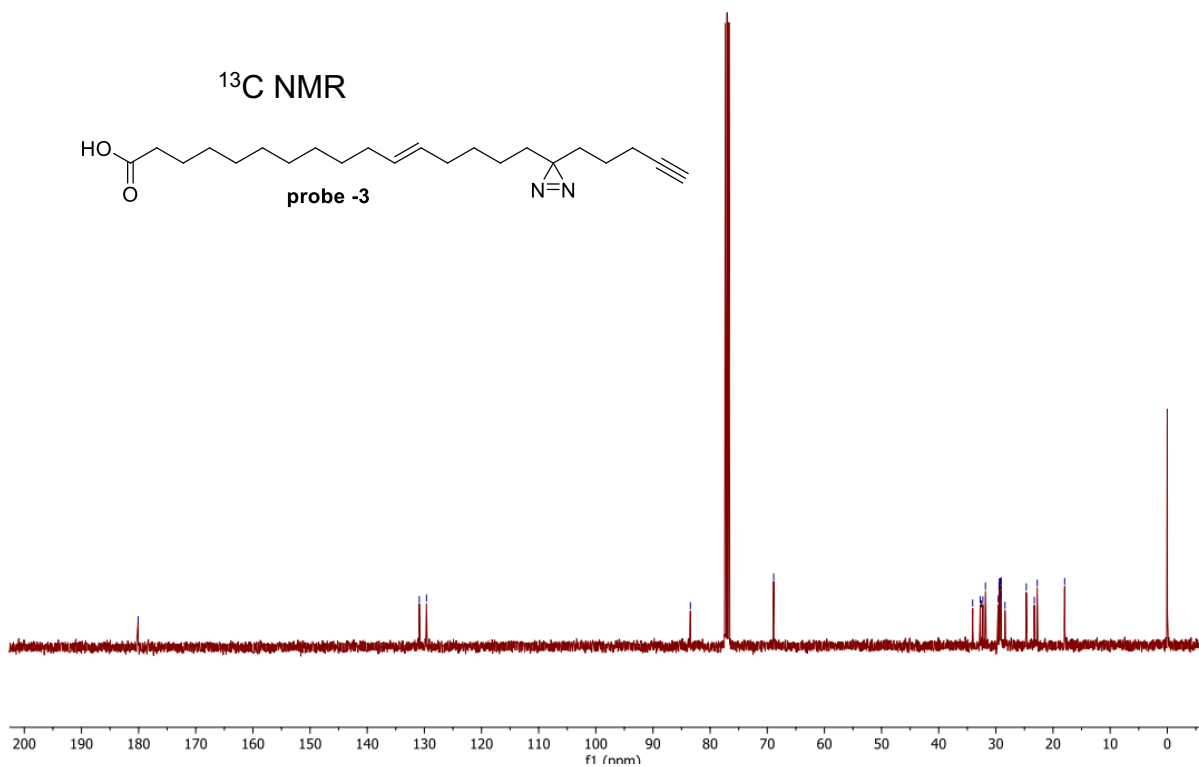

504

- 505  
506 1 Jana, S., Sarpe, V. A. & Kulkarni, S. S. Total Synthesis of Emmyguyacins A and B, Potential  
507 Fusion Inhibitors of Influenza Virus. *Org Lett* **20**, 6938-6942 (2018).  
508 <https://doi.org:10.1021/acs.orglett.8b03073>
- 509 2 W.J. Kerr, A. J. M., and L.C. Paterson. Synthesis of  $\alpha$ -methylene propellanone via the  
510 strategic employment of metal-mediated cyclisation chemistry. *Tetrahedron* **71**, 5356-5361  
511 (2015). <https://doi.org:https://doi.org/10.1016/j.tet.2015.06.003>
- 512 3 Inui, M., Nakazaki, A. & Kobayashi, S. Highly stereoselective construction of  
513 spiro[4.5]decanes by SmI(2)-promoted ketyl radical mediated tandem cyclization. *Org Lett* **9**,  
514 469-472 (2007). <https://doi.org:10.1021/ol0628255>  
515
